# Supplementary material for: Mixed-Substituted Single-Source Precursors for Si1–xGex Thin Film Deposition
Source: PubMed Central journal article supplement (PMC9627566; doi:10.1021/acs.inorgchem.2c02835), 2022-10-19
Supplement: ic2c02835_si_001.pdf [file ic2c02835_si_001.pdf]

# Supporting Information

## Mixed-Substituted Single-Source Precursors for Si<sub>1-x</sub>Ge<sub>x</sub> Thin Film Deposition

*Benedikt Köstler,<sup>1</sup> Felix Jungwirth,<sup>2</sup> Luisa Achenbach,<sup>1</sup> Masiar Sistani,<sup>3</sup> Michael Bolte,<sup>1</sup> Hans-Wolfram Lerner,<sup>1</sup> Philipp Albert,<sup>4</sup> Matthias Wagner,<sup>1,\*</sup> and Sven Barth<sup>2,\*</sup>*

<sup>1</sup> Institute for Inorganic and Analytical Chemistry, Goethe University Frankfurt, Max-von-Laue-Str. 7, 60438 Frankfurt, Germany.

<sup>2</sup> Physical Institute, Goethe University Frankfurt, Max-von-Laue-Str. 1, 60438 Frankfurt, Germany.

<sup>3</sup> Institute of Solid State Electronics, TU Wien, Gußhausstraße 25-25a, 1040 Vienna, Austria.

<sup>4</sup> Evonik Operations GmbH, Smart Materials, Untere Kanalstraße 3, 79618 Rheinfelden, Germany.

*Corresponding authors:*

M. Wagner: matthias.wagner@chemie.uni-frankfurt.de

S. Barth: barth@physik.uni-frankfurt.de

### Content:

|      |                                                                                                                                       |     |
|------|---------------------------------------------------------------------------------------------------------------------------------------|-----|
| 1.   | Proposed Process for the Formation of the Si–Ge precursors.....                                                                       | S2  |
| 2.   | Single-Crystal X-ray Analyses.....                                                                                                    | S4  |
| 3.   | Plots of <sup>1</sup> H, <sup>13</sup> C { <sup>1</sup> H}, <sup>29</sup> Si { <sup>1</sup> H}, and <sup>29</sup> Si NMR Spectra..... | S7  |
| 3.1. | NMR Spectra of <b>1-Cl</b> .....                                                                                                      | S7  |
| 3.2. | NMR Spectra of <b>2-Cl</b> .....                                                                                                      | S9  |
| 3.3. | NMR Spectra of <b>3-Cl</b> .....                                                                                                      | S11 |
| 3.4. | NMR Spectra of Cl–Ph <sub>2</sub> Ge–Ph <sub>2</sub> Ge–Cl.....                                                                       | S13 |
| 3.5. | NMR Spectra of <b>1-H</b> .....                                                                                                       | S15 |
| 3.6. | NMR Spectra of <b>2-H</b> .....                                                                                                       | S18 |
| 3.7. | NMR Spectra of <b>3-H</b> .....                                                                                                       | S21 |
| 4.   | Characterization of CVD Coatings.....                                                                                                 | S24 |
| 4.1. | General Considerations.....                                                                                                           | S24 |
| 5.   | References.....                                                                                                                       | S27 |
|      |                                                                                                                                       | S1  |

# 1. Proposed Process for the Formation of the Si–Ge precursors

A) Generation of trichlorosilanide via the Cl<sup>−</sup>-induced disproportionation of Si<sub>2</sub>Cl<sub>6</sub>

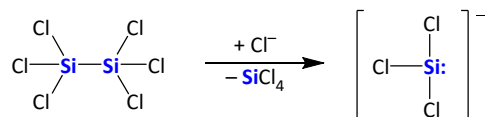

B) Generation of diphenyl(chloro)germanide via Cl<sup>+</sup>-ion abstraction

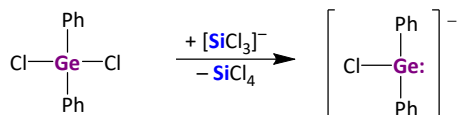

B<sub>1</sub>) Known formation of isolable trichlorogermanide

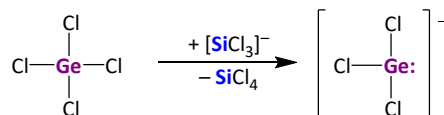

C) Germanide attacks Ph<sub>2</sub>GeCl<sub>2</sub> to build a Ge–Ge bond; digermane is silylated twice to form 1-Cl

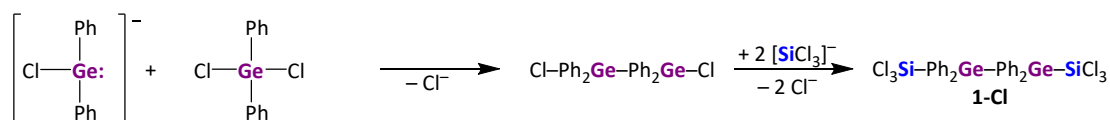

D) Germanide attacks Si<sub>2</sub>Cl<sub>6</sub> to build a Ge–Si bond; silylgermane is silylated again to form 2-Cl

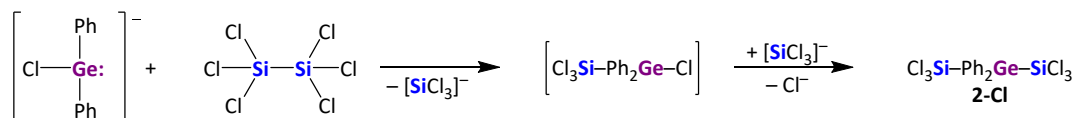

=> Theoretically required stoichiometries according to the proposed mechanism

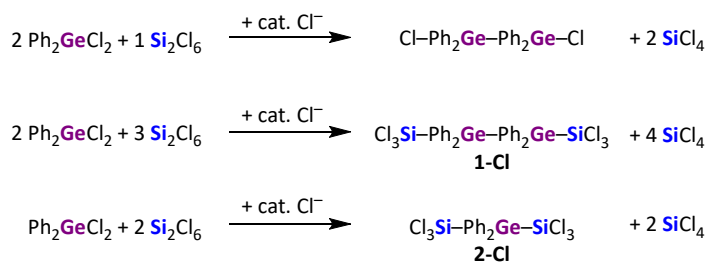

Experimentally optimized stoichiometries

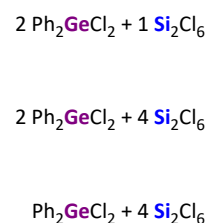

**Figure S1.** Conceivable mechanism to rationalize the stoichiometries *n*:*m* required for the formation of **1-Cl** and **2-Cl** from *n* Ph<sub>2</sub>GeCl<sub>2</sub>, *m* Si<sub>2</sub>Cl<sub>6</sub>, and cat. [nBu<sub>4</sub>N]Cl; for B<sub>1</sub>, see Ref.<sup>[1]</sup>

**A)** The Cl<sup>−</sup>-induced heterolysis of the Si–Si bond in Si<sub>2</sub>Cl<sub>6</sub> leads to the formation of SiCl<sub>4</sub> and the reactive intermediate [SiCl<sub>3</sub>]<sup>−</sup>.<sup>[2]</sup>

**B)** [SiCl<sub>3</sub>]<sup>−</sup> abstracts a Cl<sup>+</sup> ion from Ph<sub>2</sub>GeCl<sub>2</sub> to generate [Ph<sub>2</sub>GeCl]<sup>−</sup> and SiCl<sub>4</sub>. This assumption is supported by the known reaction of GeCl<sub>4</sub> with [SiCl<sub>3</sub>]<sup>−</sup>, which yields SiCl<sub>4</sub> and the isolable germanide [GeCl<sub>3</sub>]<sup>−</sup> (cf. **B**<sub>1</sub>).<sup>[1]</sup> Although [GeCl<sub>3</sub>]<sup>−</sup> itself is a very weak nucleophile, its Ph derivatives have been successfully employed to generate digermanes, e.g., Ph<sub>3</sub>GeNa +

$\text{Et}_3\text{GeBr} \rightarrow \text{Ph}_3\text{Ge-GeEt}_3 + \text{NaBr}$ .<sup>[3, 4]</sup> Given this background, it is reasonable to assume that also  $[\text{Ph}_2\text{GeCl}]^-$  is sufficiently nucleophilic to attack either the Ge atom in  $\text{Ph}_2\text{GeCl}_2$  (cf. **C**) or the Si atoms in  $\text{Si}_2\text{Cl}_6$  or  $\text{SiCl}_4$  (cf. **D**). These two pathways compete with each other.

**C)** We have shown by experiment that the reaction of 2  $\text{Ph}_2\text{GeCl}_2$  with 1  $\text{Si}_2\text{Cl}_6$  and cat.  $[\text{nBu}_4\text{N}]\text{Cl}$  affords  $\text{Cl-Ph}_2\text{Ge-Ph}_2\text{Ge-Cl}$  as main product ( $^{13}\text{C}\{^1\text{H}\}$  NMR spectroscopic control; isolated in 43% yield). Subsequent treatment of the digermane with 2  $\text{Si}_2\text{Cl}_6/\text{cat. Cl}^-$  indeed furnished **1-Cl**, thereby confirming the proposed reaction mechanism. Although 1.5 equiv.  $\text{Si}_2\text{Cl}_6$  should be sufficient for the one-pot reaction to **1-Cl**, in practice it is advantageous to use 2 equiv.  $\text{Si}_2\text{Cl}_6$ .

**D)** First, we have shown by experiment that **1-Cl** is inert toward  $[\text{SiCl}_3]^-$  under the conditions applied in the synthesis of **2-Cl**. This rules out the digermane **1-Cl** as an intermediate along the path to **2-Cl**, but rather suggests that both Ge-Si bonds are formed already on the monogermane. According to our empirical findings, the theoretically required 2 equiv.  $\text{Si}_2\text{Cl}_6$  are not sufficient for the formation of **2-Cl**, but rather give **1-Cl**. The problem is solved by use of 4 equiv.  $\text{Si}_2\text{Cl}_6$  and we believe that the excess is necessary to ensure that Ge-Si-bond formation can outcompete the apparently very favorable Ge-Ge-bond formation.

## 2. Single-Crystal X-ray Analyses

Data sets for both structures were collected on a STOE IPDS II two-circle diffractometer with a Genix Microfocus tube with mirror optics using MoK $\alpha$  radiation ( $\lambda = 0.71073 \text{ \AA}$ ). The data sets were scaled using the frame-scaling procedure in the *X-AREA* program system.<sup>[5]</sup> The structures were solved by direct methods using the program *SHELXS*<sup>[6]</sup> and refined against  $F^2$  with full-matrix least-squares techniques using the program *SHELXL*<sup>[6]</sup>.

CCDC files CCDC 2182827 (**1-Cl**) and CCDC 2182828 (**1-H**) contain the supplementary crystallographic data for this paper and can be obtained free of charge from The Cambridge Crystallographic Data Centre via [www.ccdc.cam.ac.uk/data\\_request/cif](http://www.ccdc.cam.ac.uk/data_request/cif).

**1-H** crystallizes with two half molecules in the asymmetric unit. The other half of both molecules is generated by a two-fold rotation axis. One molecule is shown in Figure 1 of the main article. In the second molecule, the Ge atom and one SiH<sub>3</sub> group are disordered over two equally occupied positions. The absolute structure was determined, Flack-x-parameter 0.06(4).

**Table S1.** Crystal data and structure refinement for **1-Cl**.

|                                      |                                                                                 |                            |
|--------------------------------------|---------------------------------------------------------------------------------|----------------------------|
| CCDC code                            | 2182827                                                                         |                            |
| Empirical formula                    | C <sub>24</sub> H <sub>20</sub> Cl <sub>6</sub> Ge <sub>2</sub> Si <sub>2</sub> |                            |
| Formula weight                       | 722.46                                                                          |                            |
| Temperature                          | 173(2) K                                                                        |                            |
| Wavelength                           | 0.71073 Å                                                                       |                            |
| Crystal system                       | Monoclinic                                                                      |                            |
| Space group                          | C2/c                                                                            |                            |
| Unit cell dimensions                 | $a = 9.8305(5) \text{ \AA}$                                                     | $\alpha = 90^\circ$        |
|                                      | $b = 17.8639(7) \text{ \AA}$                                                    | $\beta = 101.309(4)^\circ$ |
|                                      | $c = 16.8410(9) \text{ \AA}$                                                    | $\gamma = 90^\circ$        |
| Volume                               | 2900.0(2) Å <sup>3</sup>                                                        |                            |
| Z                                    | 4                                                                               |                            |
| Density (calculated)                 | 1.655 Mg/m <sup>3</sup>                                                         |                            |
| Absorption coefficient               | 2.722 mm <sup>-1</sup>                                                          |                            |
| F(000)                               | 1432                                                                            |                            |
| Crystal size                         | 0.250 × 0.200 × 0.200 mm <sup>3</sup>                                           |                            |
| Theta range for data collection      | 3.729 to 33.205°                                                                |                            |
| Index ranges                         | -15 ≤ h ≤ 15, -27 ≤ k ≤ 27, -25 ≤ l ≤ 24                                        |                            |
| Reflections collected                | 33798                                                                           |                            |
| Independent reflections              | 5510 [ $R(\text{int}) = 0.0864$ ]                                               |                            |
| Completeness to theta = 25.000°      | 99.2 %                                                                          |                            |
| Absorption correction                | Semi-empirical from equivalents                                                 |                            |
| Max. and min. transmission           | 1.000 and 0.598                                                                 |                            |
| Refinement method                    | Full-matrix least-squares on F <sup>2</sup>                                     |                            |
| Data / restraints / parameters       | 5510 / 0 / 154                                                                  |                            |
| Goodness-of-fit on F <sup>2</sup>    | 0.981                                                                           |                            |
| Final R indices [ $I > 2\sigma(I)$ ] | $RI = 0.0409$ , $wR2 = 0.1014$                                                  |                            |
| R indices (all data)                 | $RI = 0.0475$ , $wR2 = 0.1060$                                                  |                            |
| Largest diff. peak and hole          | 1.333 and -0.643 e·Å <sup>-3</sup>                                              |                            |

Symmetry transformation used to generate equivalent atoms:  $-x+1, y, -z+3/2$

**Table S2.** Crystal data and structure refinement for **1-H**.

|                                        |                                                                 |                             |
|----------------------------------------|-----------------------------------------------------------------|-----------------------------|
| CCDC code                              | 2182828                                                         |                             |
| Empirical formula                      | C <sub>24</sub> H <sub>26</sub> Ge <sub>2</sub> Si <sub>2</sub> |                             |
| Formula weight                         | 515.81                                                          |                             |
| Temperature                            | 173(2) K                                                        |                             |
| Wavelength                             | 0.71073 Å                                                       |                             |
| Crystal system                         | Monoclinic                                                      |                             |
| Space group                            | C2                                                              |                             |
| Unit cell dimensions                   | $a = 16.771(4)$ Å                                               | $\alpha = 90^\circ$         |
|                                        | $b = 11.529(2)$ Å                                               | $\beta = 110.932(18)^\circ$ |
|                                        | $c = 13.476(3)$ Å                                               | $\gamma = 90^\circ$         |
| Volume                                 | 2433.7(9) Å <sup>3</sup>                                        |                             |
| Z                                      | 4                                                               |                             |
| Density (calculated)                   | 1.408 Mg/m <sup>3</sup>                                         |                             |
| Absorption coefficient                 | 2.576 mm <sup>-1</sup>                                          |                             |
| F(000)                                 | 1048                                                            |                             |
| Crystal size                           | 0.180 × 0.150 × 0.120 mm <sup>3</sup>                           |                             |
| Theta range for data collection        | 3.351 to 26.440°                                                |                             |
| Index ranges                           | -20 ≤ h ≤ 20, -14 ≤ k ≤ 14, -16 ≤ l ≤ 16                        |                             |
| Reflections collected                  | 12091                                                           |                             |
| Independent reflections                | 4965 [ $R(\text{int}) = 0.0747$ ]                               |                             |
| Completeness to theta = 25.000°        | 99.6 %                                                          |                             |
| Absorption correction                  | Semi-empirical from equivalents                                 |                             |
| Max. and min. transmission             | 1.000 and 0.750                                                 |                             |
| Refinement method                      | Full-matrix least-squares on $F^2$                              |                             |
| Data / restraints / parameters         | 4965 / 37 / 267                                                 |                             |
| Goodness-of-fit on $F^2$               | 1.077                                                           |                             |
| Final $R$ indices [ $I > 2\sigma(I)$ ] | $R1 = 0.0842$ , $wR2 = 0.2128$                                  |                             |
| $R$ indices (all data)                 | $R1 = 0.0898$ , $wR2 = 0.2174$                                  |                             |
| Largest diff. peak and hole            | 1.112 and -1.034 e·Å <sup>-3</sup>                              |                             |

Symmetry transformation used to generate equivalent atoms:  $-x+1, y+2, -z+1$

### 3. Plots of $^1\text{H}$ , $^{13}\text{C}\{^1\text{H}\}$ , $^{29}\text{Si}\{^1\text{H}\}$ , and $^{29}\text{Si}$ NMR Spectra

#### 3.1. NMR Spectra of 1-Cl

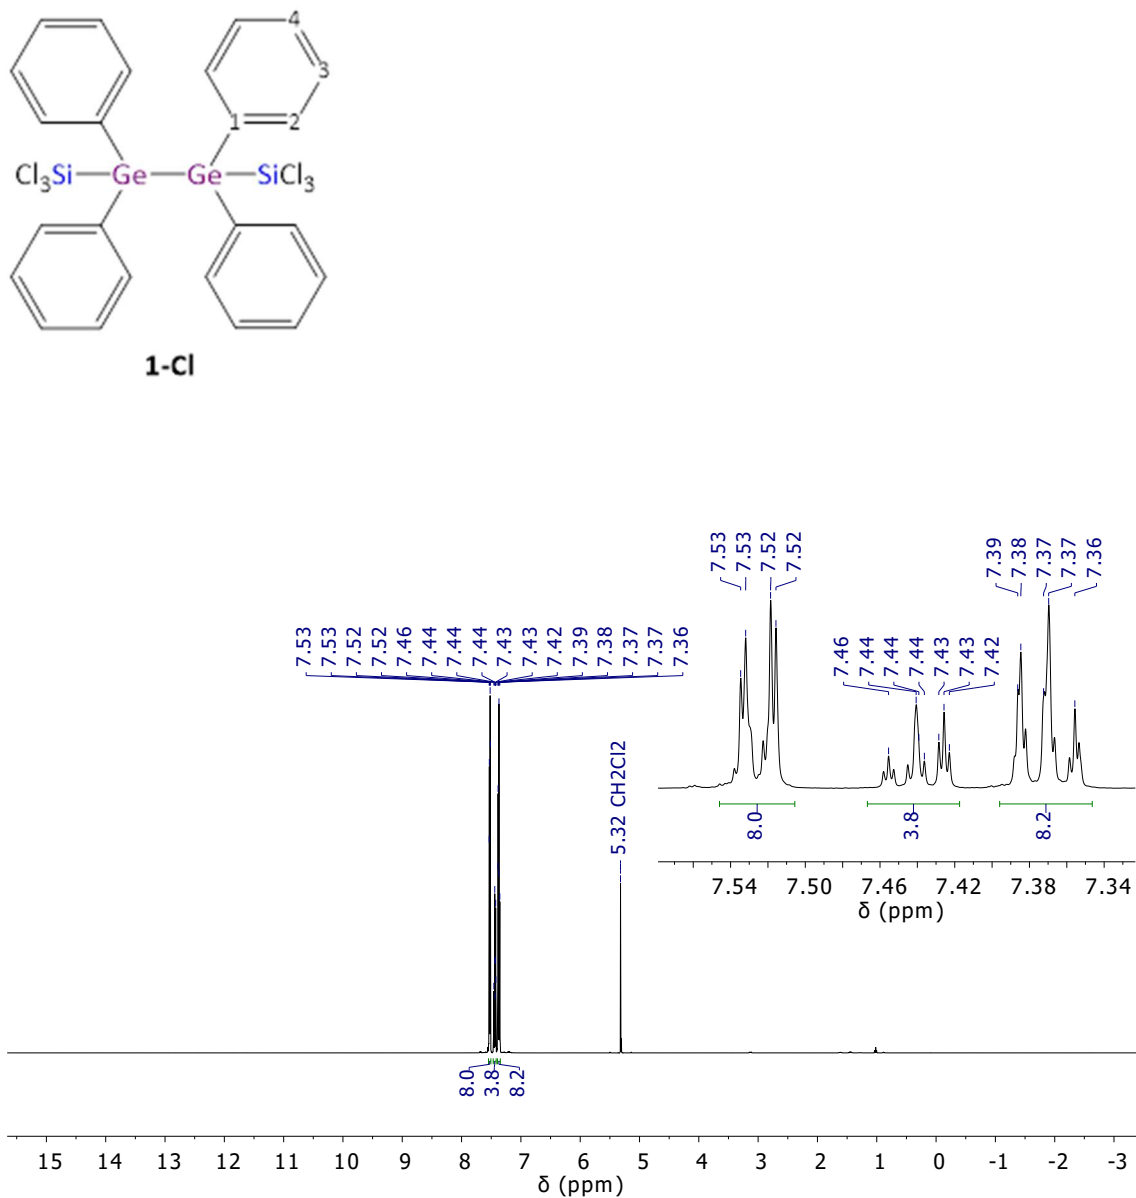

**Figure S2.**  $^1\text{H}$  NMR spectrum of 1-Cl ( $\text{CD}_2\text{Cl}_2$ , 500.2 MHz).

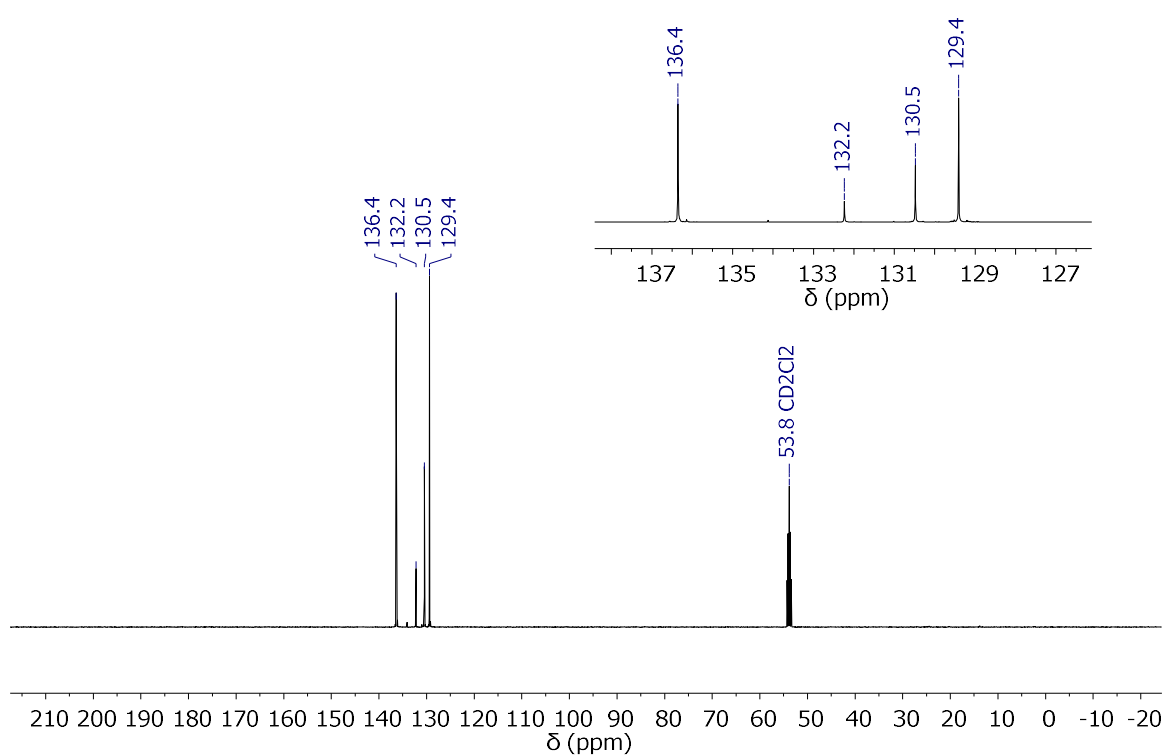

**Figure S3.**  $^{13}\text{C}\{^1\text{H}\}$  NMR spectrum of **1-Cl** ( $\text{CD}_2\text{Cl}_2$ , 125.8 MHz).

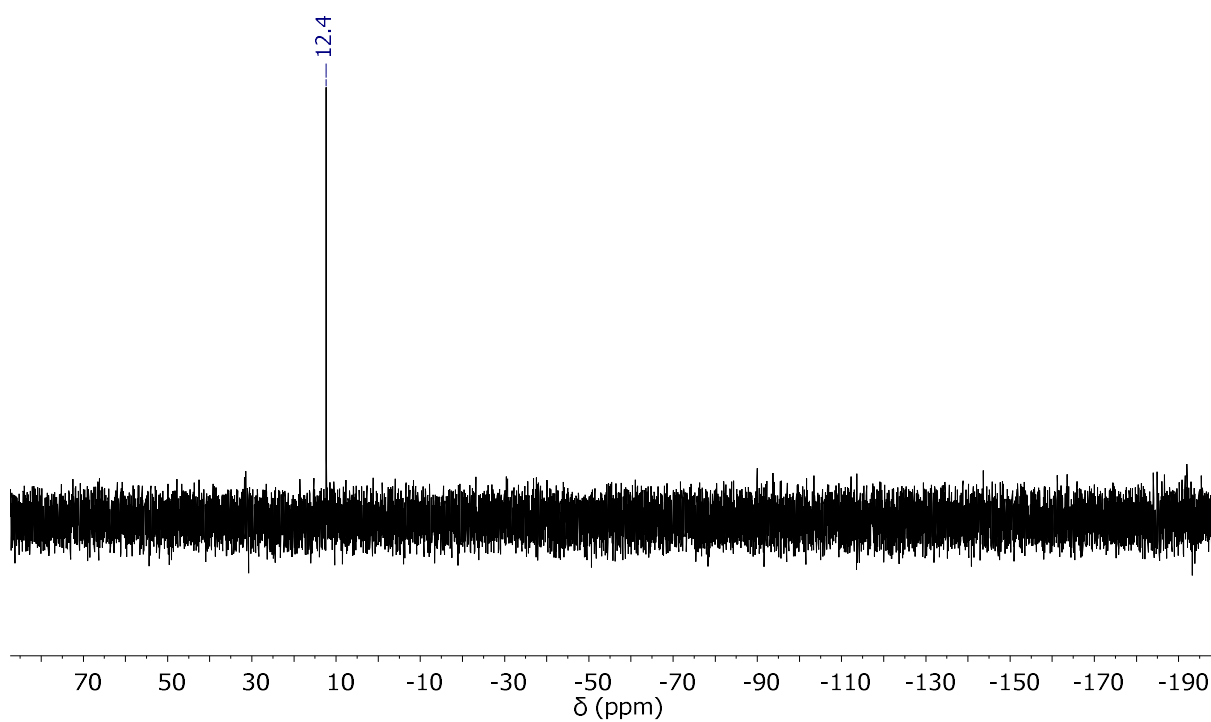

**Figure S4.**  $^{29}\text{Si}\{^1\text{H}\}$  NMR spectrum of **1-Cl** ( $\text{CD}_2\text{Cl}_2$ , 99.4 MHz).



### 3.2. NMR Spectra of 2-Cl

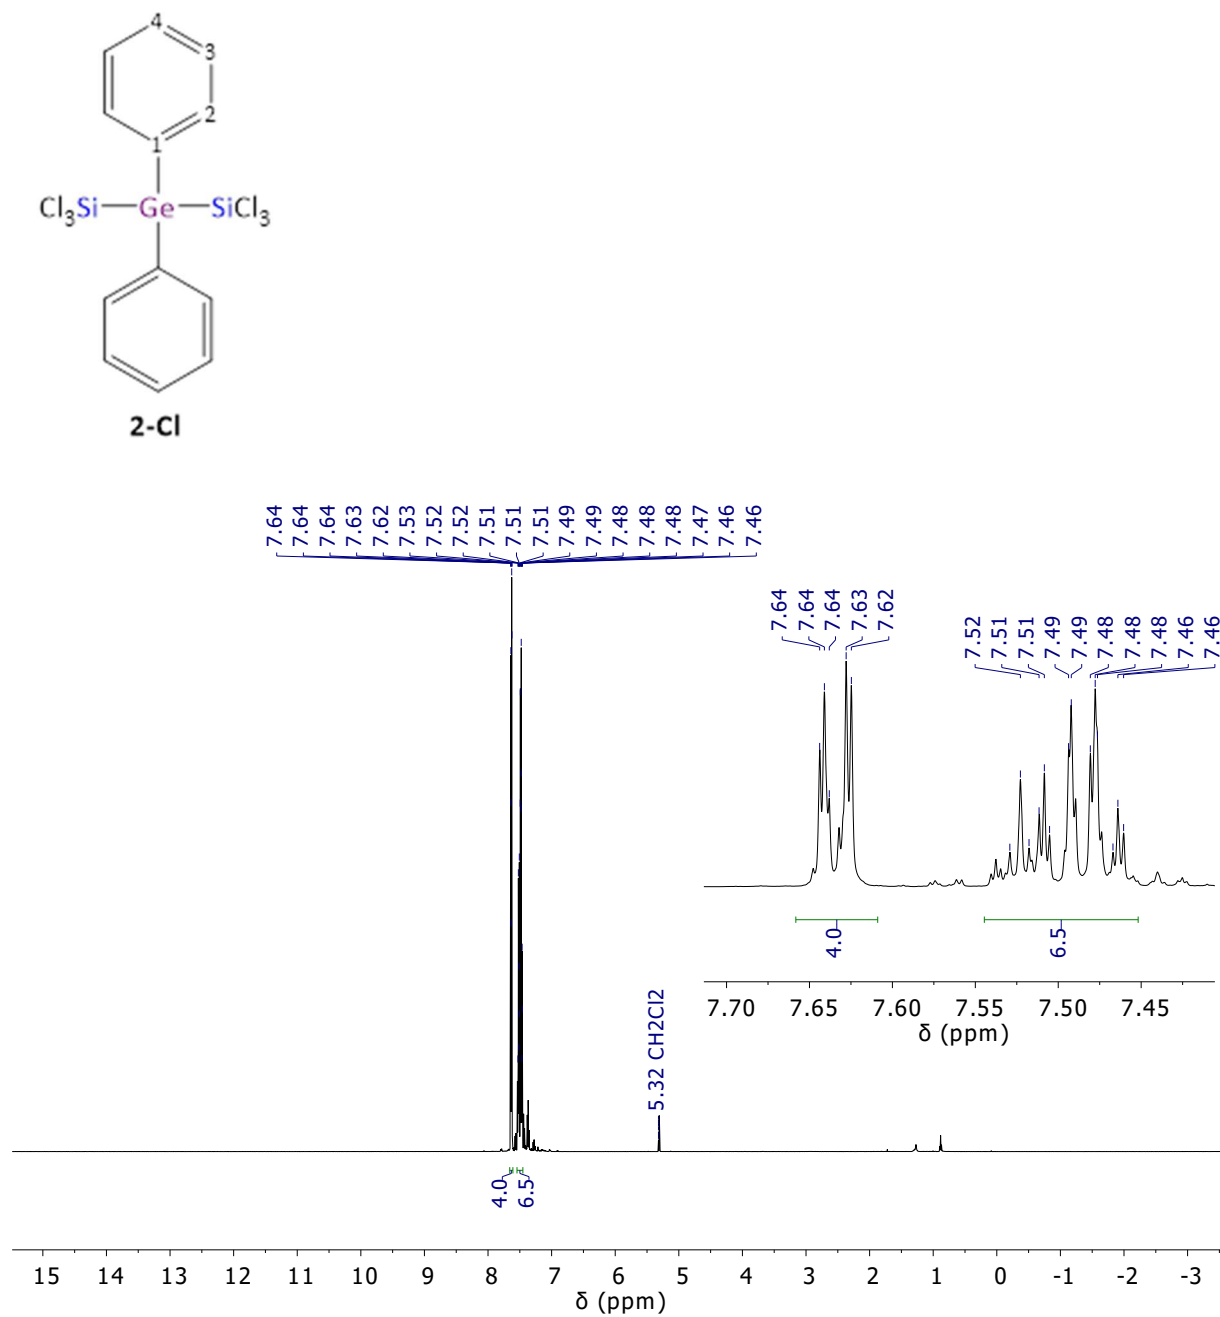

**Figure S5.**  $^1\text{H}$  NMR spectrum of 2-Cl (CD<sub>2</sub>Cl<sub>2</sub>, 500.2 MHz).

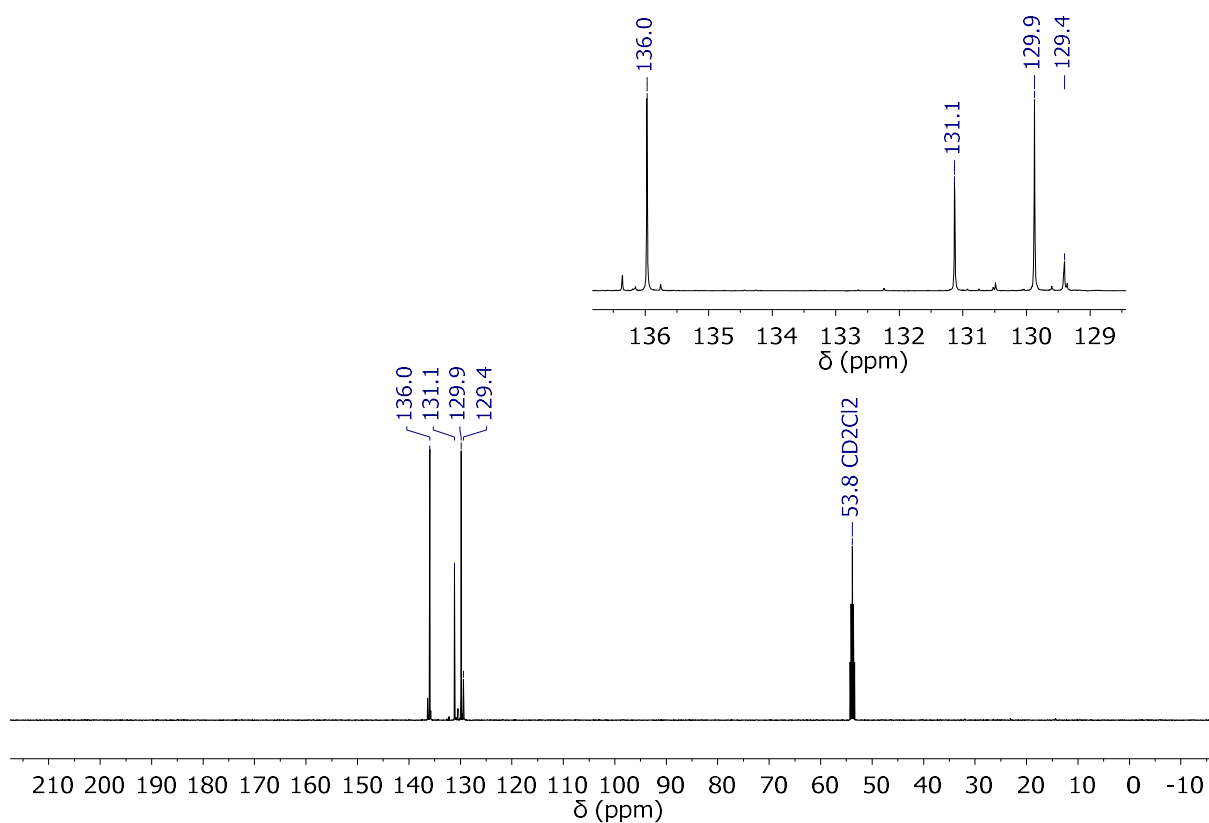

**Figure S6.**  $^{13}\text{C}\{^1\text{H}\}$  NMR spectrum of **2-Cl** ( $\text{CD}_2\text{Cl}_2$ , 125.8 MHz).

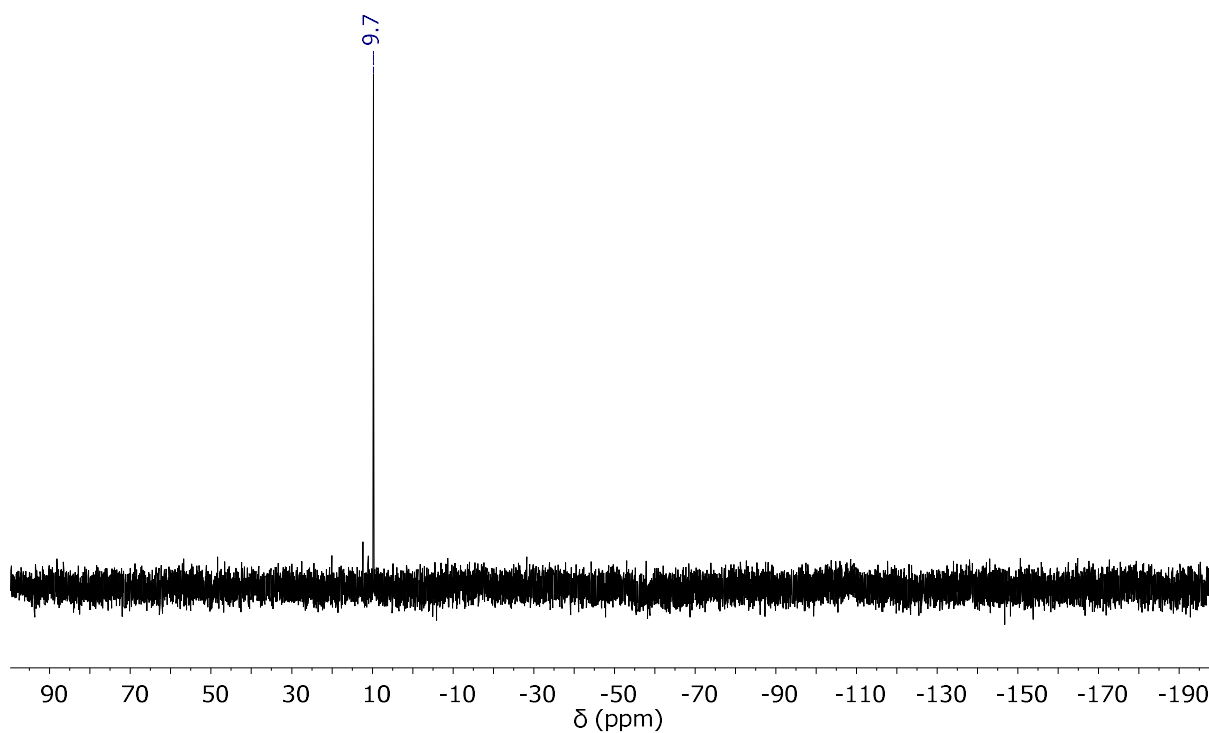

**Figure S7.**  $^{29}\text{Si}\{^1\text{H}\}$  NMR spectrum of **2-Cl** ( $\text{CD}_2\text{Cl}_2$ , 99.4 MHz).

### 3.3. NMR Spectra of 3-Cl

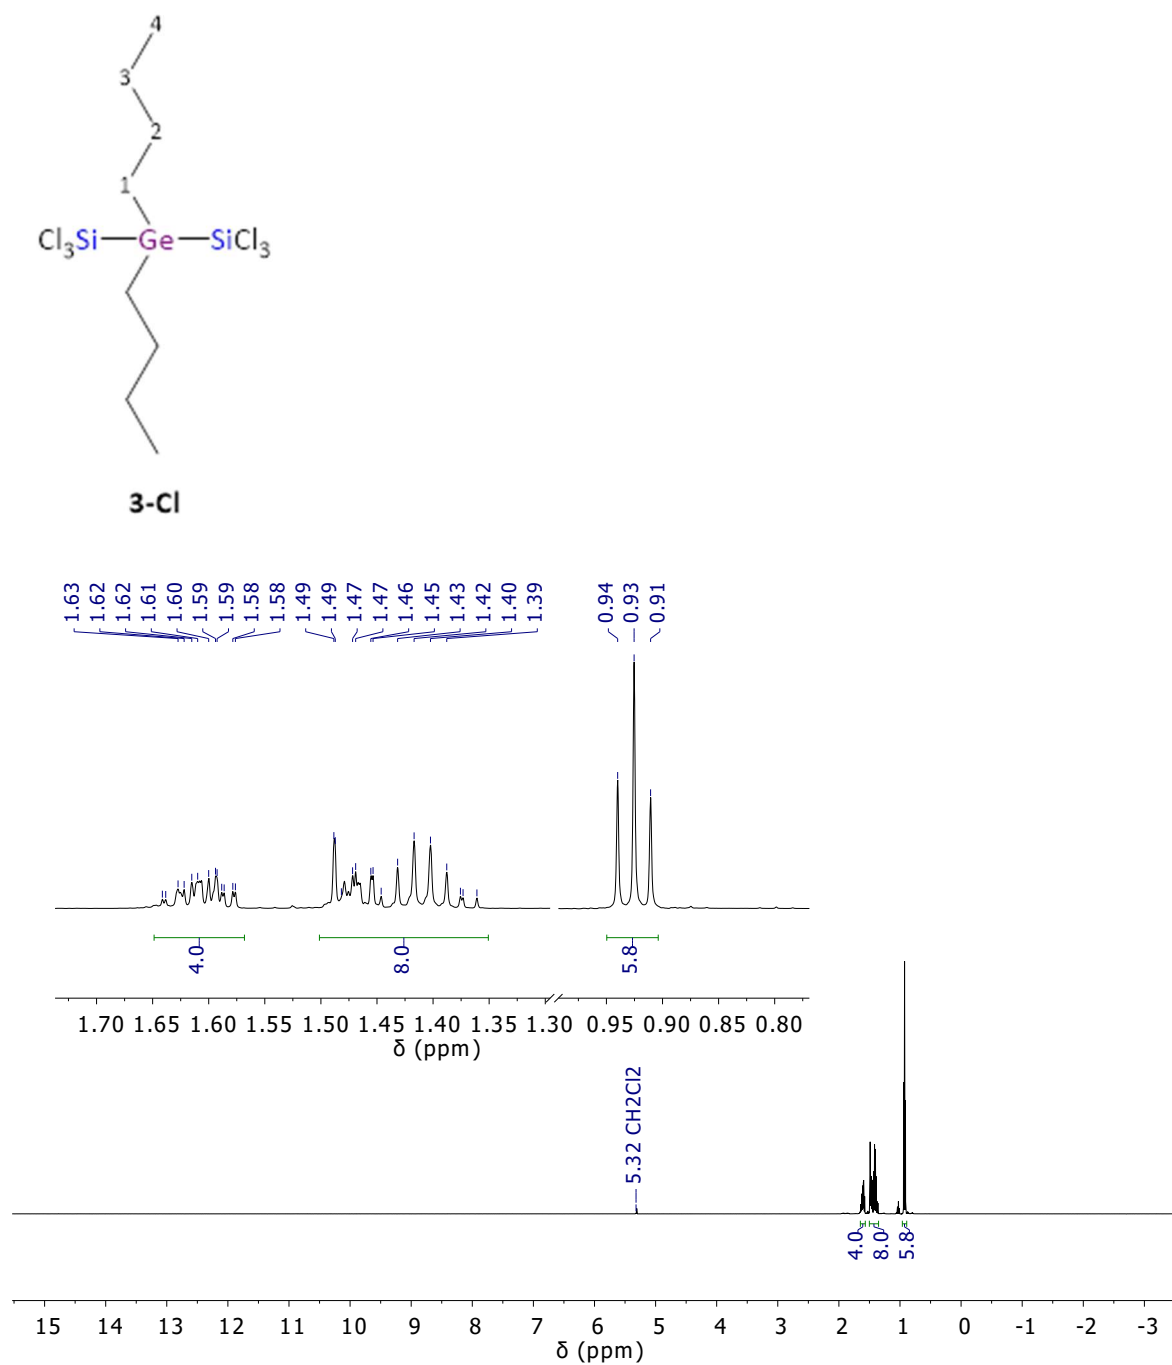

Figure S8.  $^1\text{H}$  NMR spectrum of 3-Cl (CD $_2$ Cl $_2$ , 500.2 MHz).

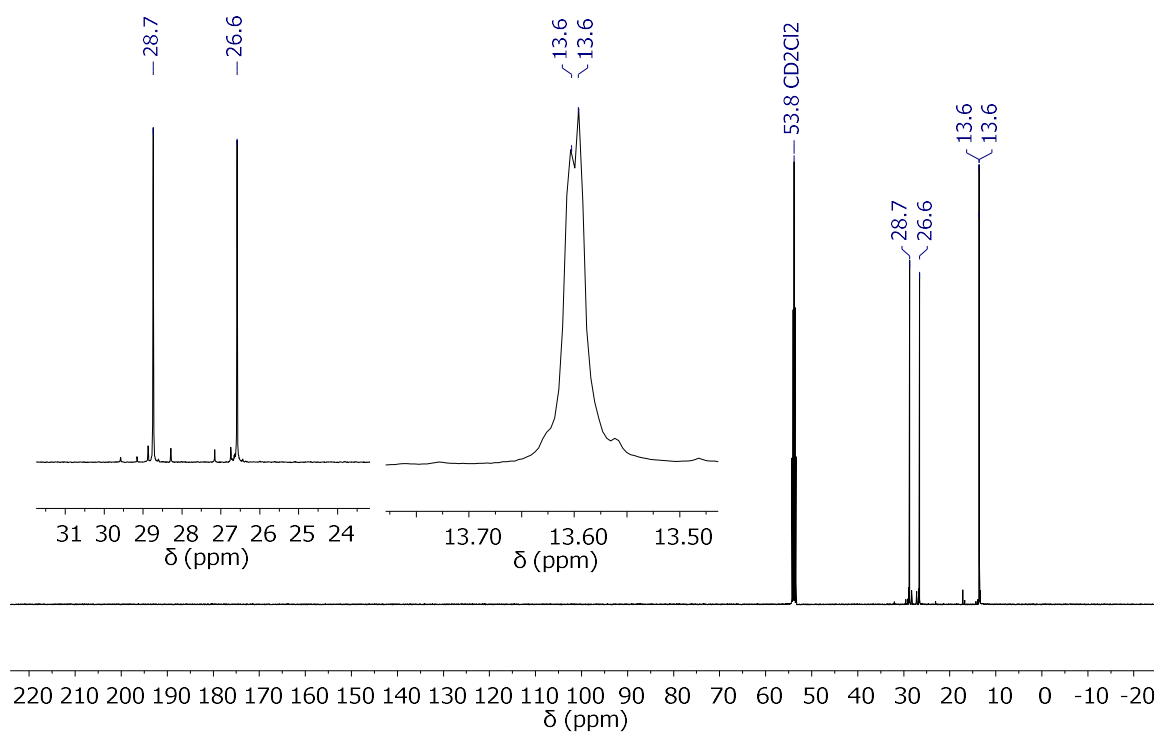

**Figure S9.**  $^{13}\text{C}\{^1\text{H}\}$  NMR spectrum of **3-Cl** ( $\text{CD}_2\text{Cl}_2$ , 125.8 MHz).

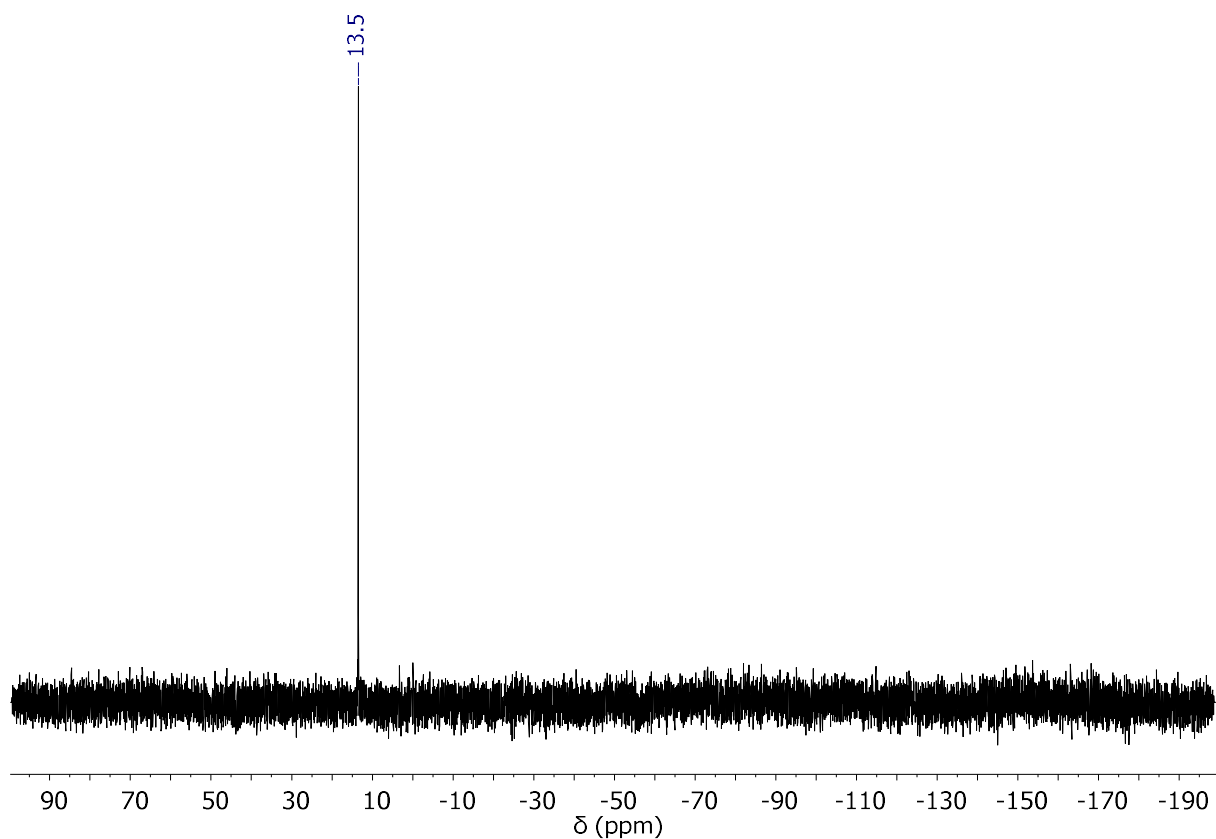

**Figure S10.**  $^{29}\text{Si}\{^1\text{H}\}$  NMR spectrum of **3-Cl** ( $\text{CD}_2\text{Cl}_2$ , 99.4 MHz).

### 3.4. NMR Spectra of Cl-Ph<sub>2</sub>Ge-Ph<sub>2</sub>Ge-Cl

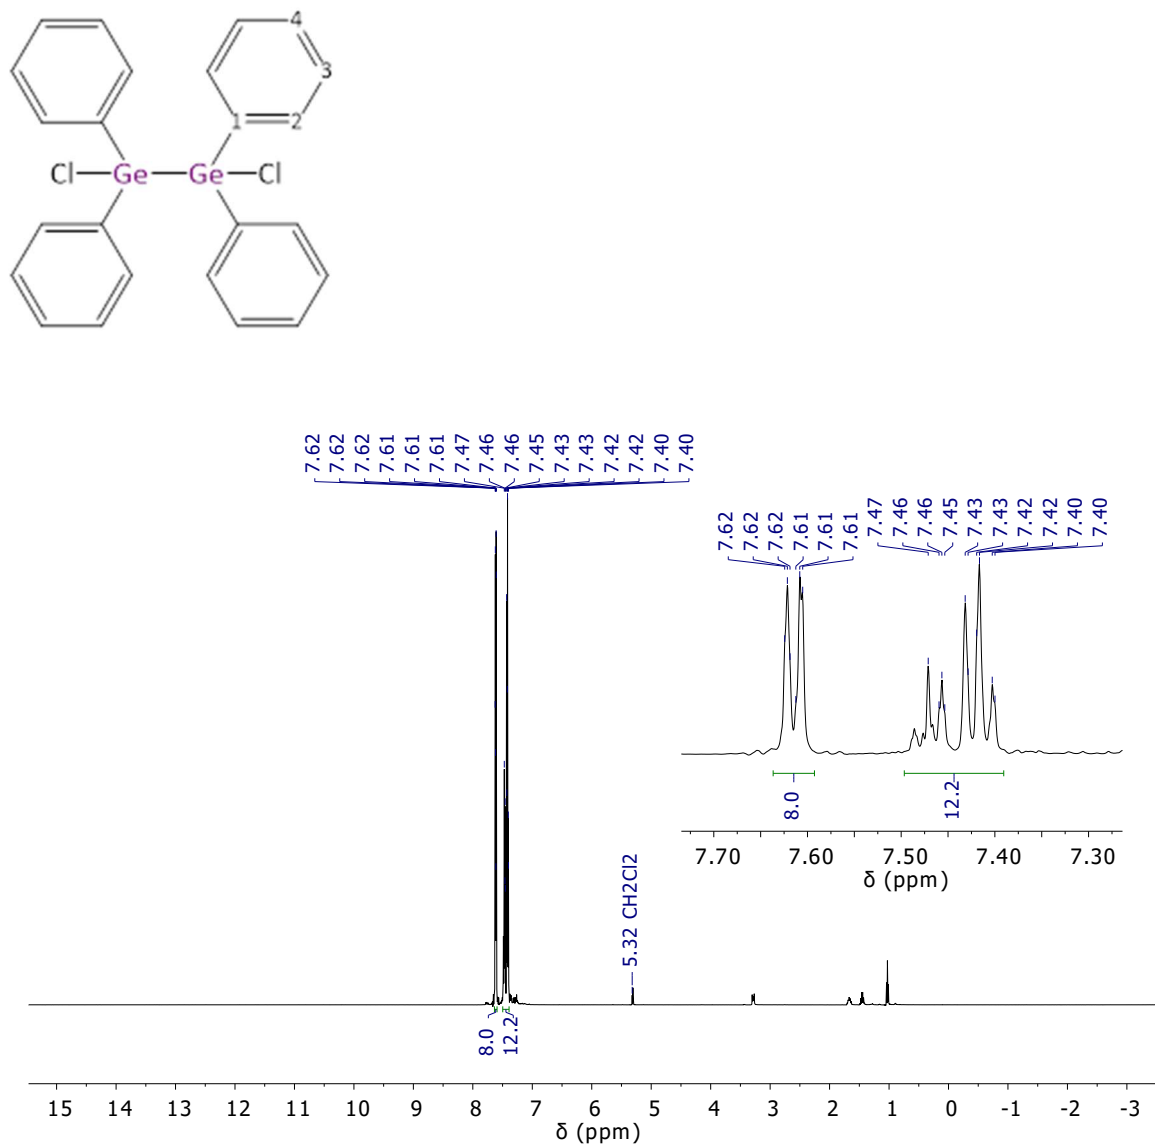

**Figure S11.** <sup>1</sup>H NMR spectrum (CD<sub>2</sub>Cl<sub>2</sub>, 500.2 MHz) of Cl-Ph<sub>2</sub>Ge-Ph<sub>2</sub>Ge-Cl containing small impurities of [nBu<sub>4</sub>N]Cl (cf. <sup>13</sup>C{<sup>1</sup>H} NMR spectrum).

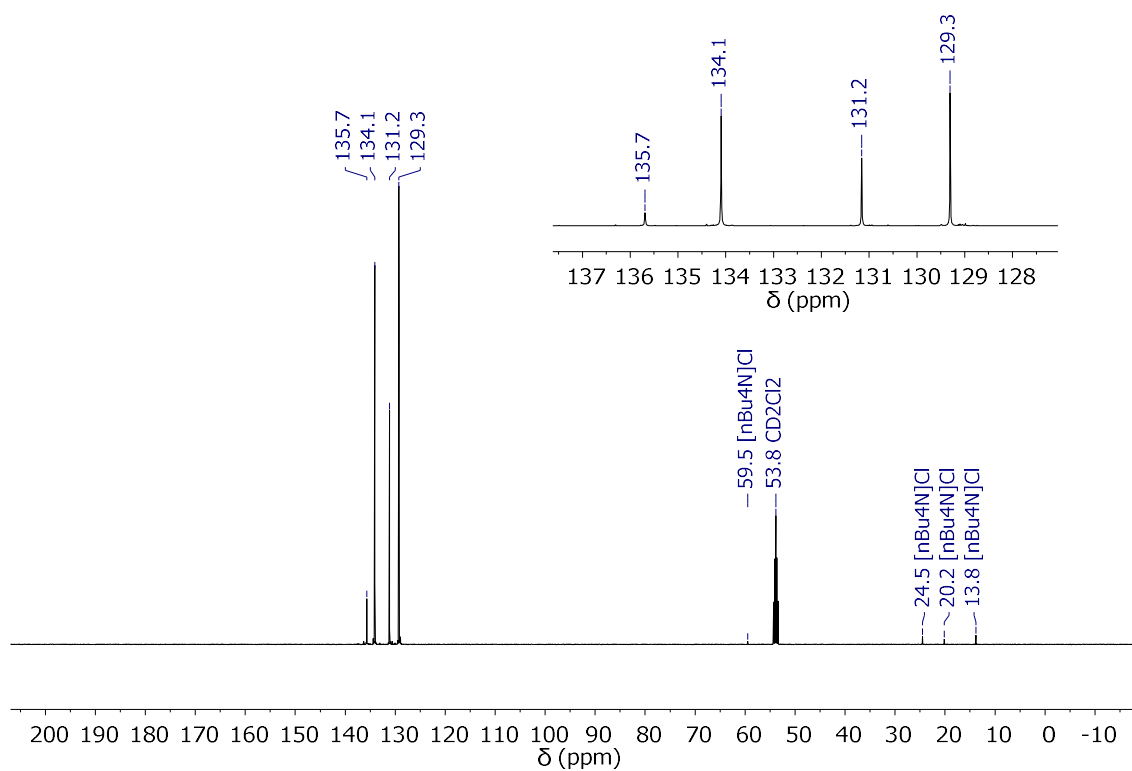

**Figure S12.**  $^{13}\text{C}\{^1\text{H}\}$  NMR spectrum ( $\text{CD}_2\text{Cl}_2$ , 125.8 MHz) of  $\text{Cl-Ph}_2\text{Ge-Ph}_2\text{Ge-Cl}$  containing small impurities of  $[\text{nBu}_4\text{N}]\text{Cl}$ .

### 3.5. NMR Spectra of 1-H

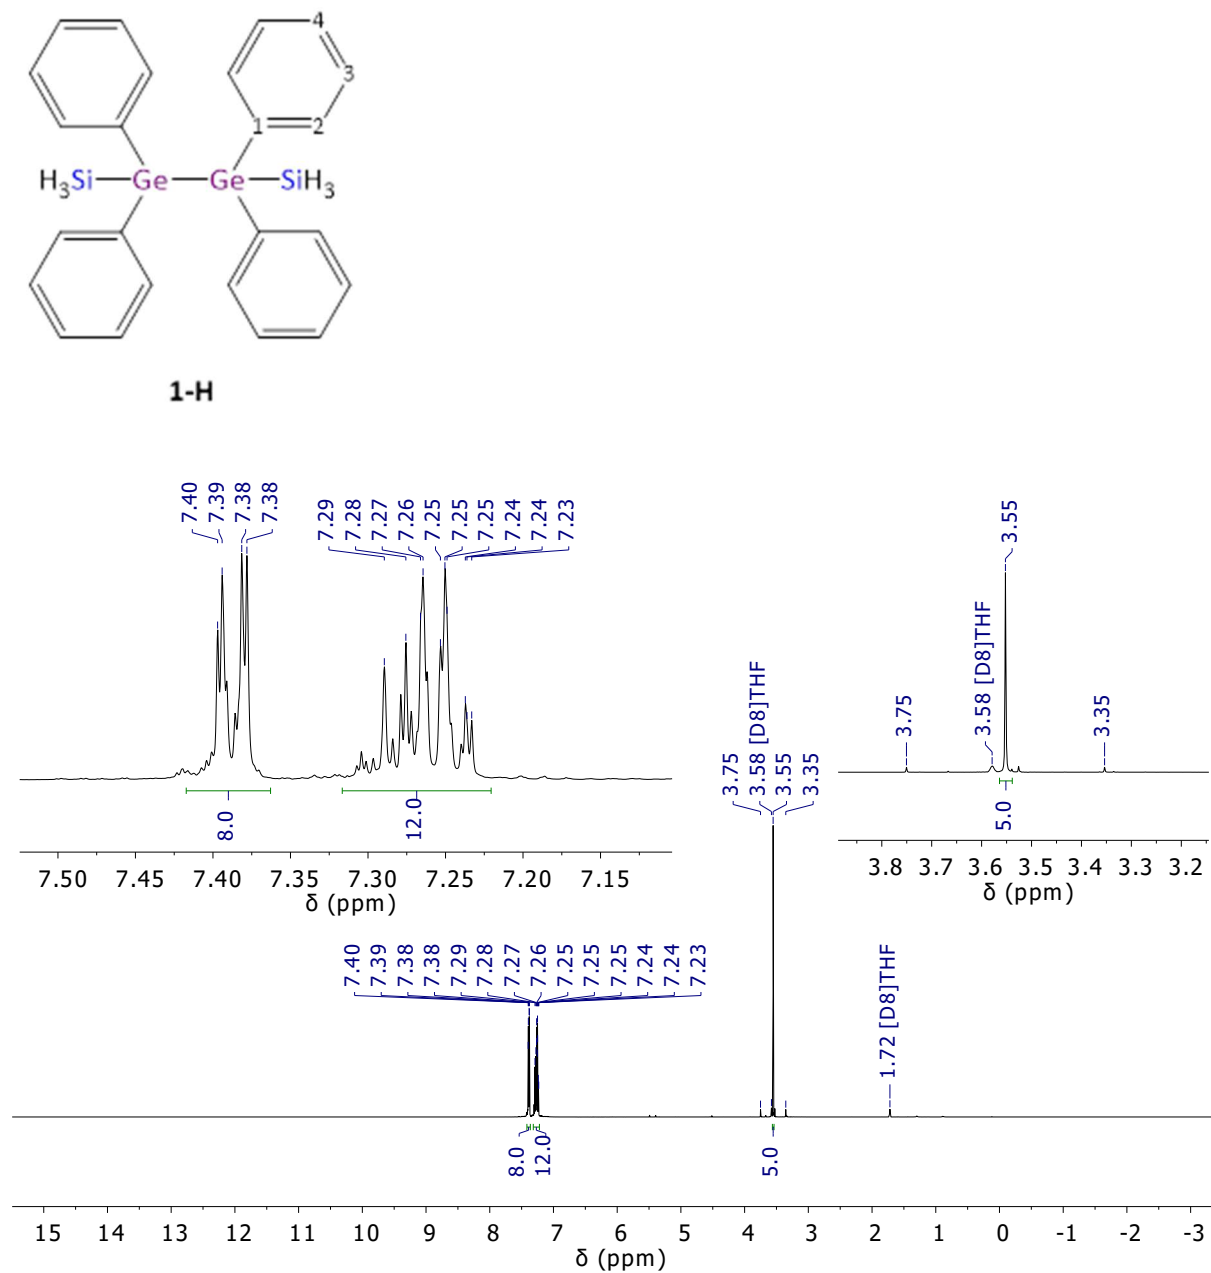

**Figure S13.**  $^1\text{H}$  NMR spectrum of **1-H** ( $[\text{D}_8]\text{THF}$ , 500.2 MHz).

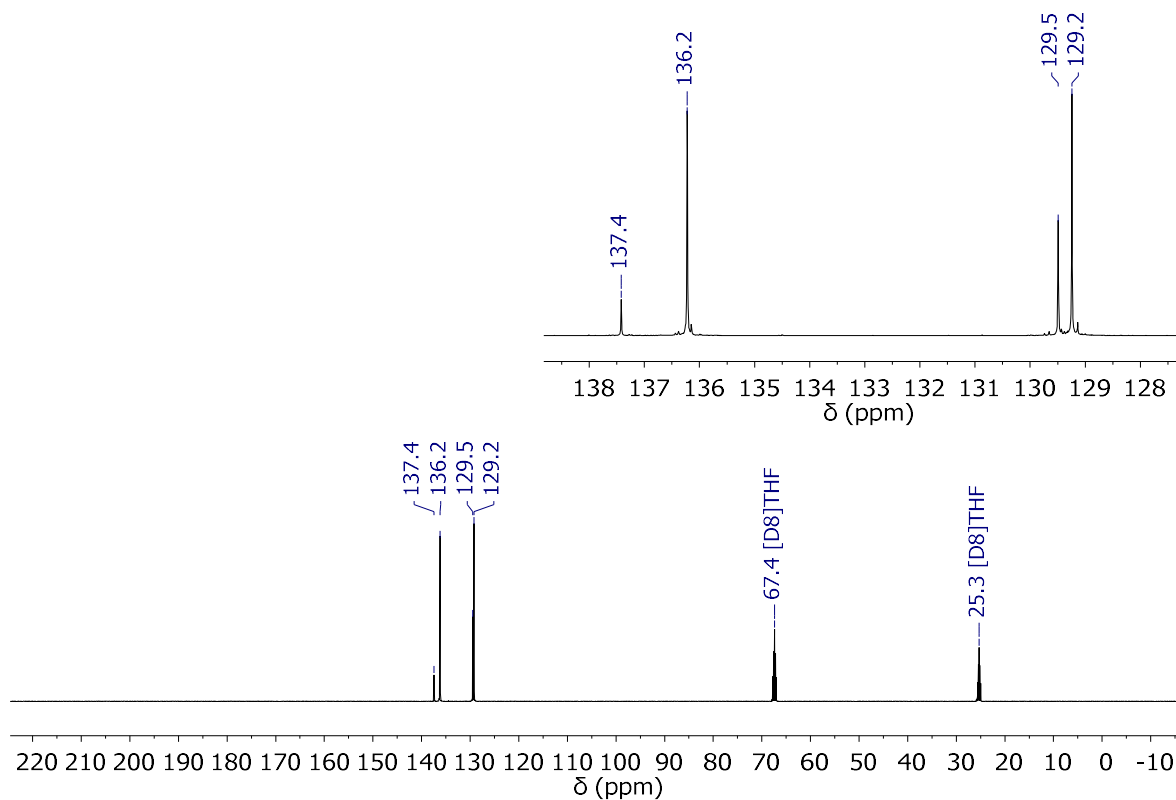

**Figure S14.**  $^{13}\text{C}\{^1\text{H}\}$  NMR spectrum of **1-H** ( $[\text{D}_8]\text{THF}$ , 125.8 MHz).

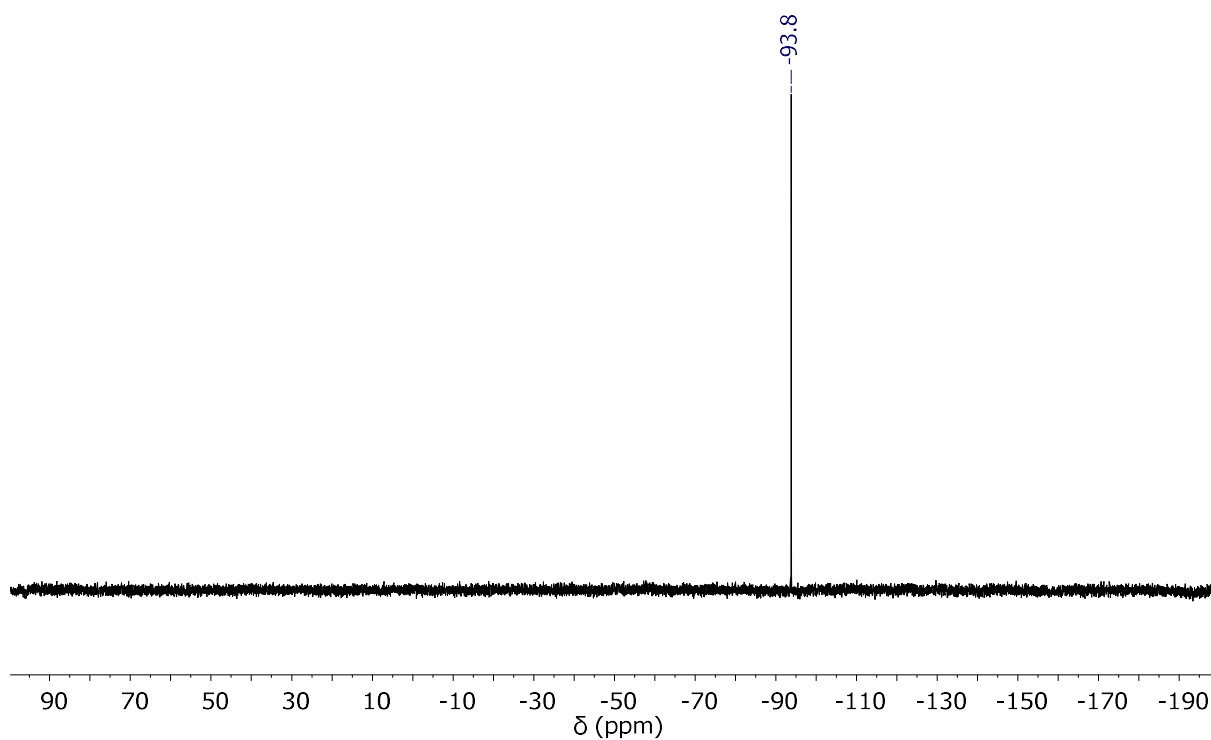

**Figure S15.**  $^{29}\text{Si}\{^1\text{H}\}$  NMR spectrum of **1-H** ( $[\text{D}_8]\text{THF}$ , 99.4 MHz).



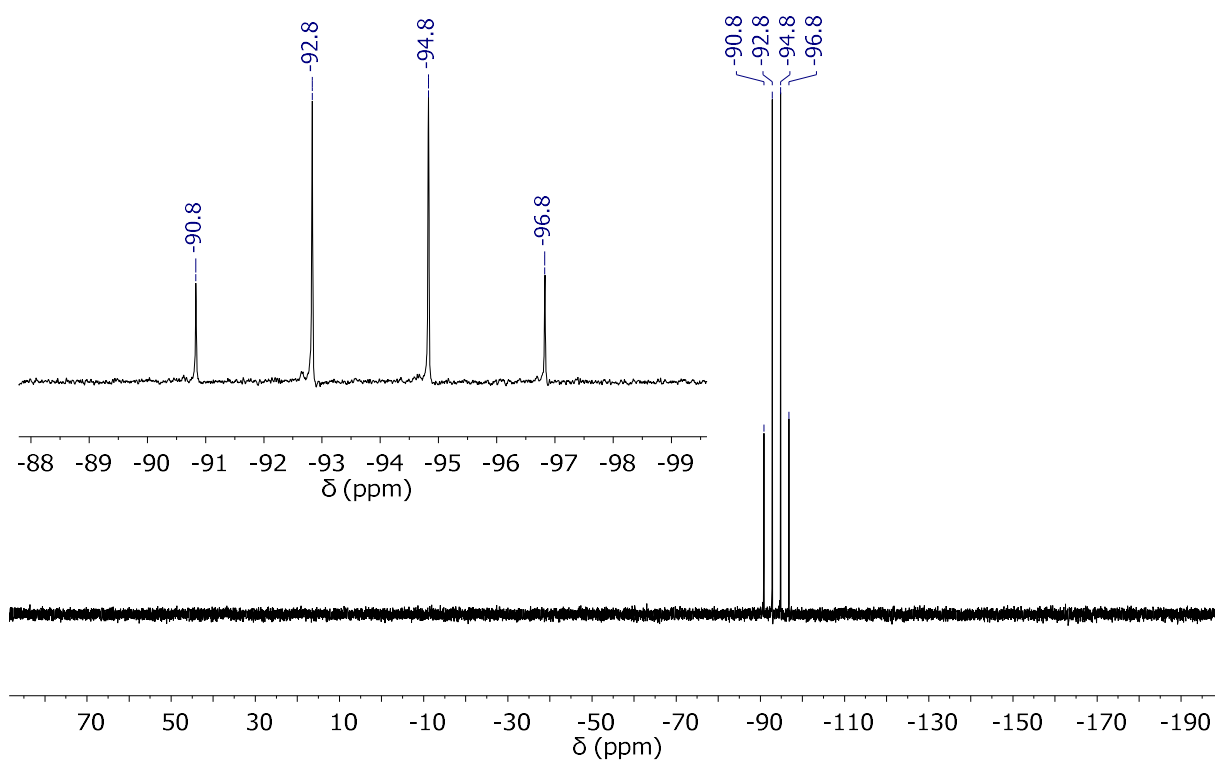

**Figure S16.**  $^{29}\text{Si}$  NMR spectrum of **1-H** ( $[\text{D}_8]\text{THF}$ , 99.4 MHz).

### 3.6. NMR Spectra of 2-H

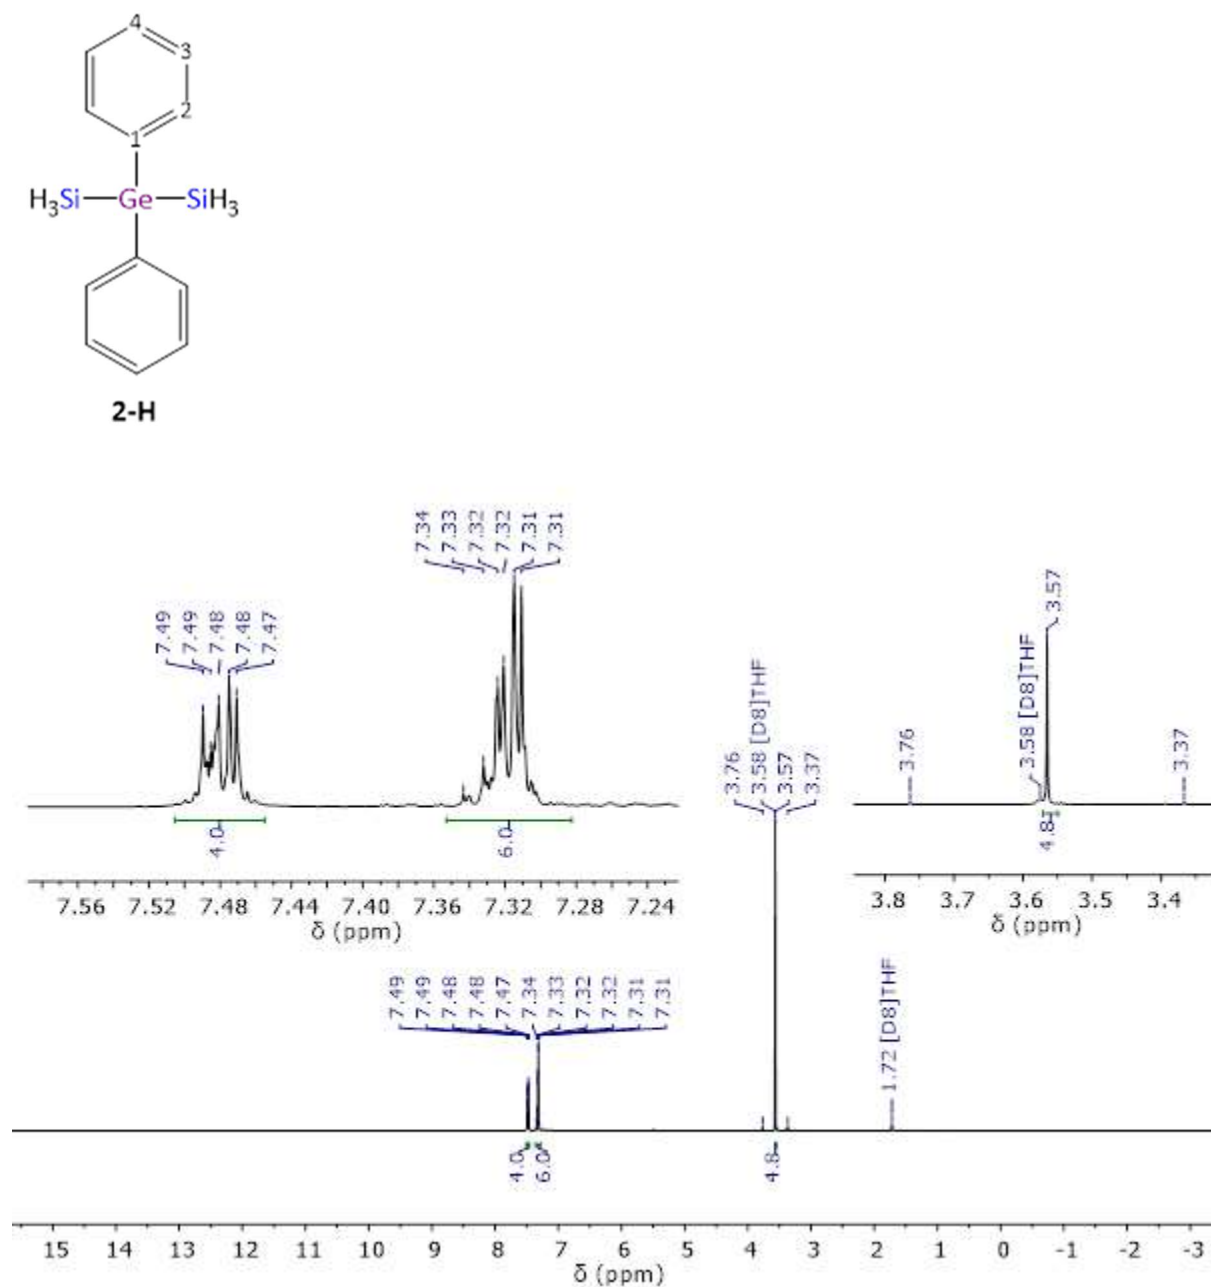

**Figure S17.**  $^1\text{H}$  NMR spectrum of **2-H** ( $[\text{D}_8]\text{THF}$ , 500.2 MHz).

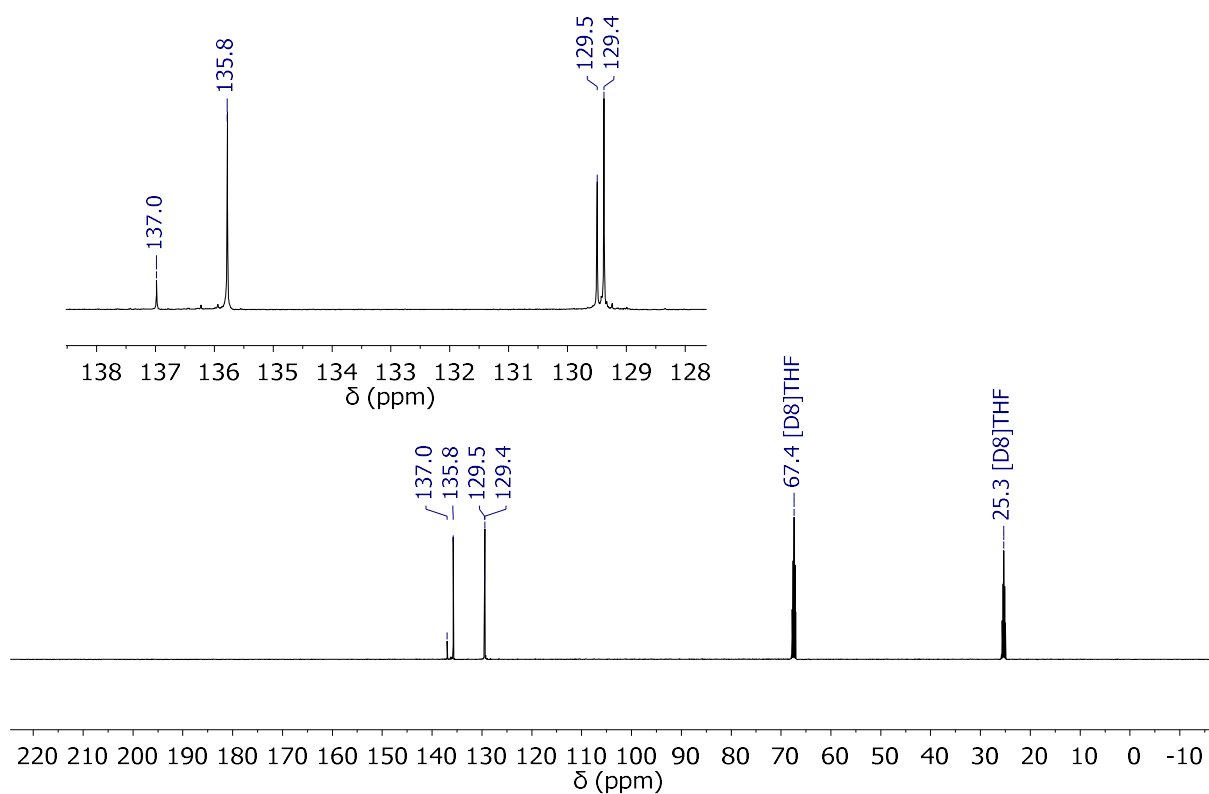

**Figure S18.**  $^{13}\text{C}\{^1\text{H}\}$  NMR spectrum of **2-H** ( $[\text{D}_8]\text{THF}$ , 125.8 MHz).

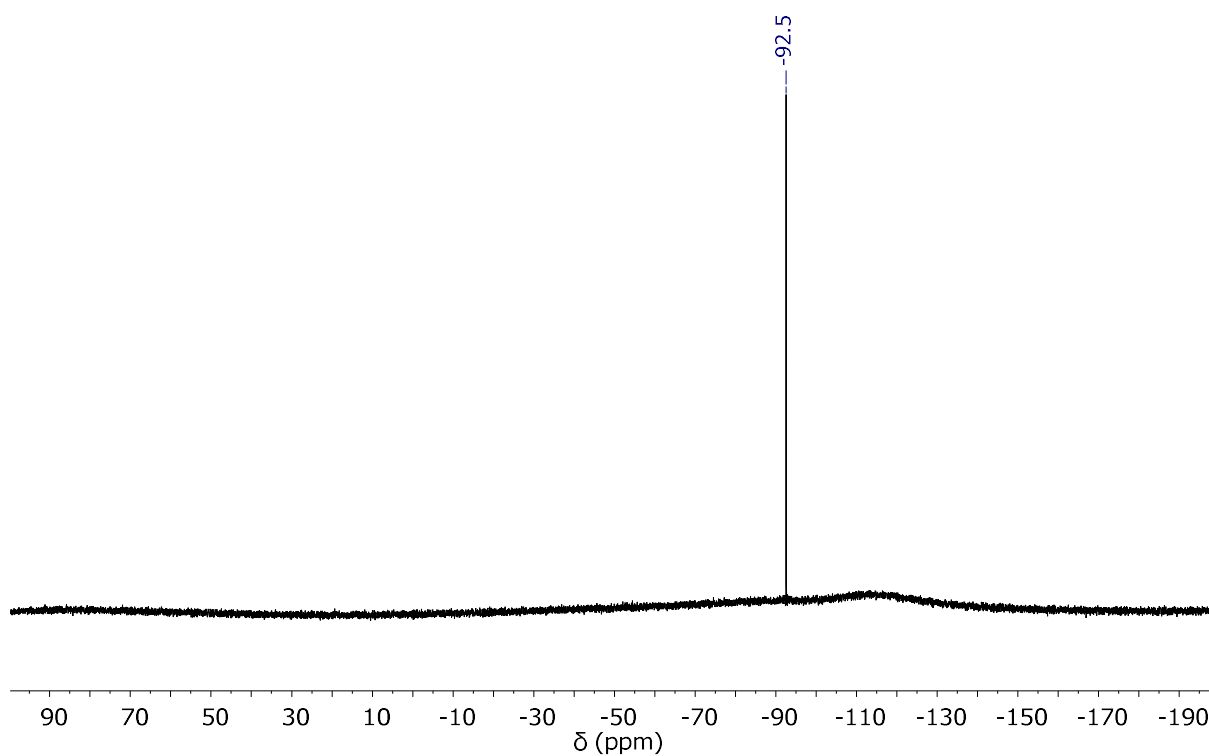

**Figure S19.**  $^{29}\text{Si}\{^1\text{H}\}+++$  NMR spectrum of **2-H** ( $[\text{D}_8]\text{THF}$ , 99.4 MHz).

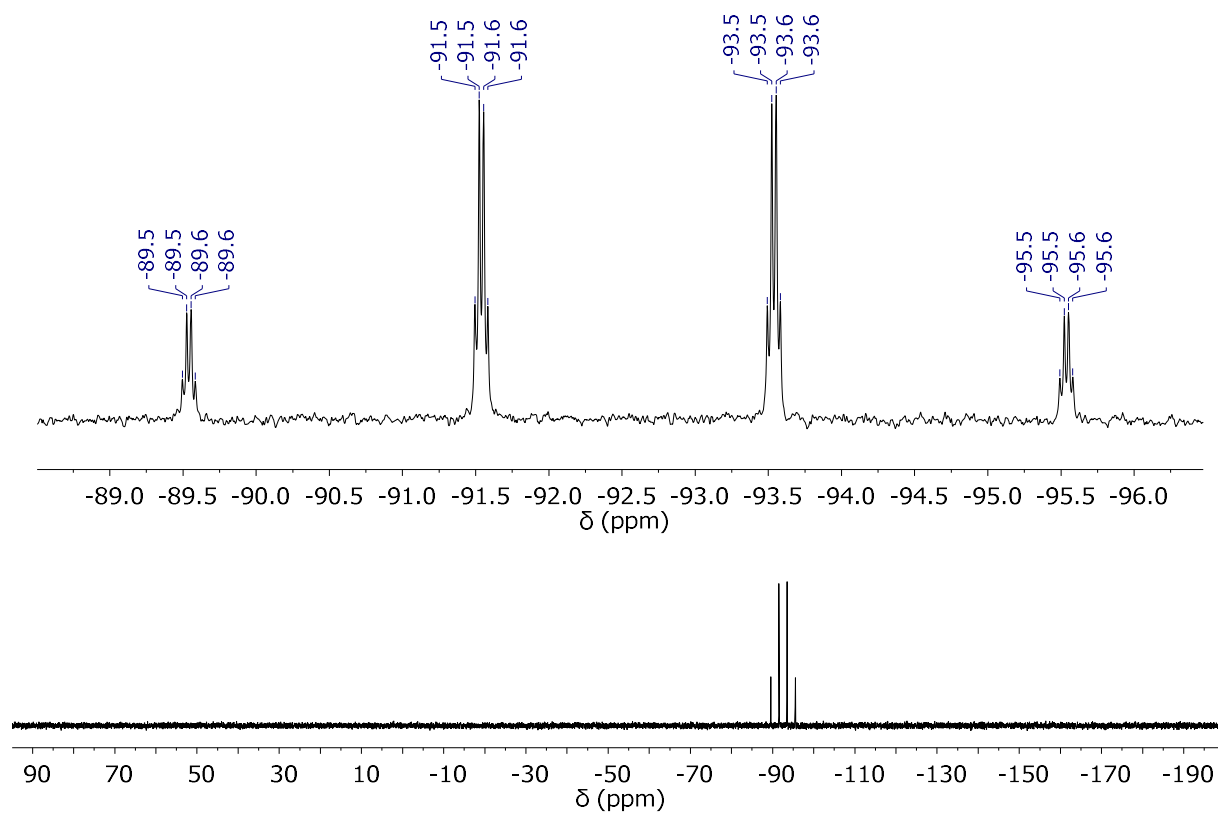

**Figure S20.**  $^{29}\text{Si}$  NMR spectrum of **2-H** ( $[\text{D}_8]\text{THF}$ , 99.4 MHz).

### 3.7. NMR Spectra of 3-H

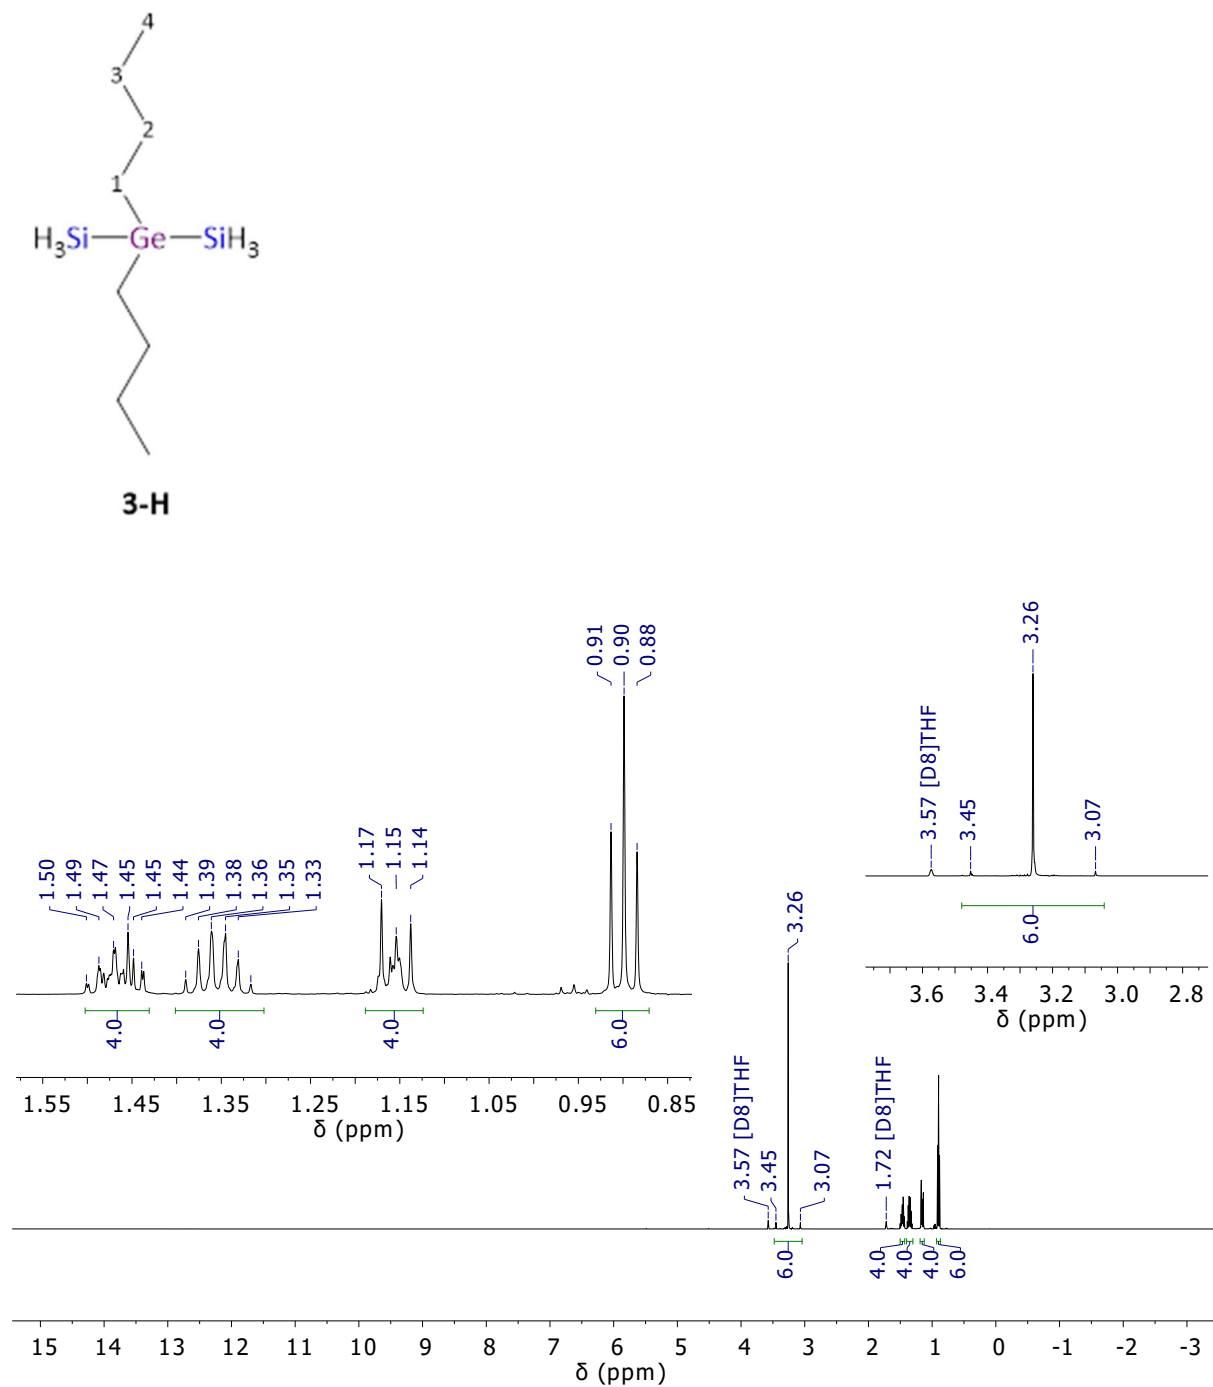

**Figure S21.**  $^1\text{H}$  NMR spectrum of 3-H ( $[\text{D}_8]\text{THF}$ , 500.2 MHz).

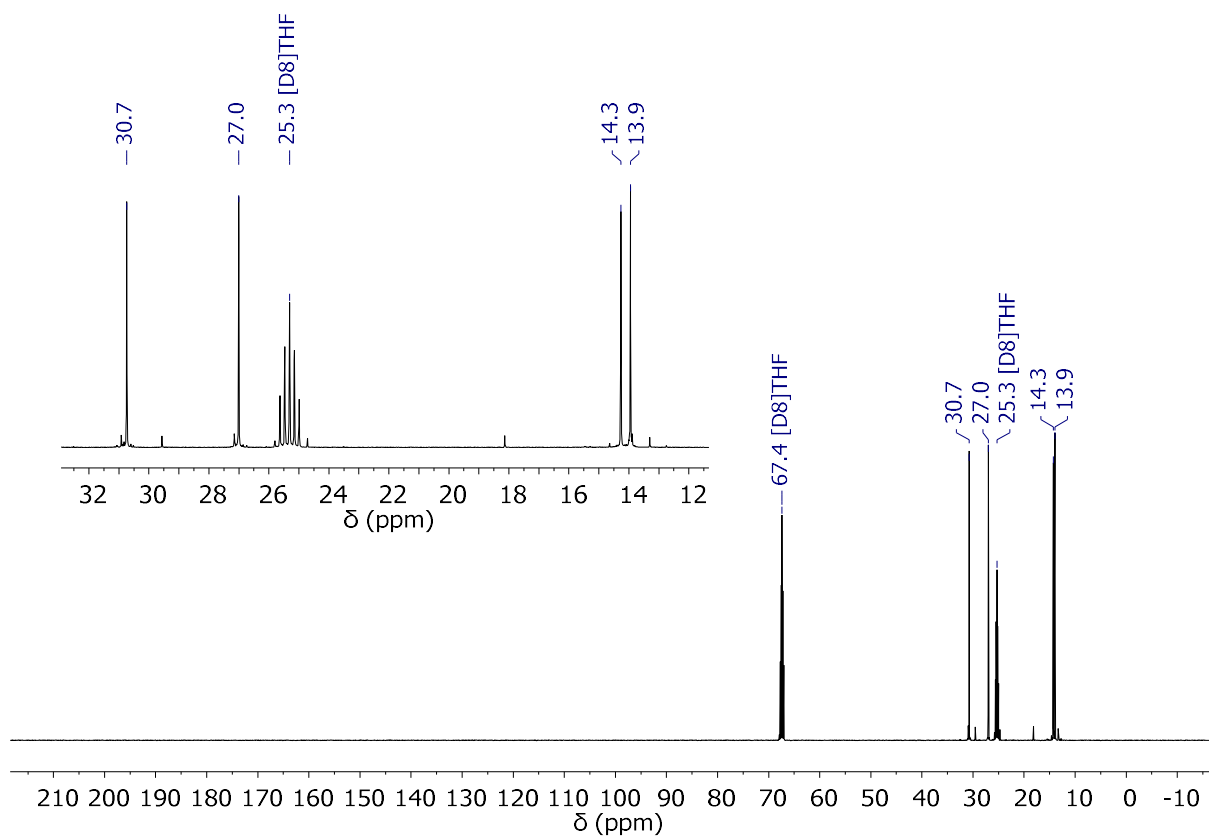

**Figure S22.**  $^{13}\text{C}\{^1\text{H}\}$  NMR spectrum of **3-H** ( $[\text{D}_8]\text{THF}$ , 125.8 MHz).

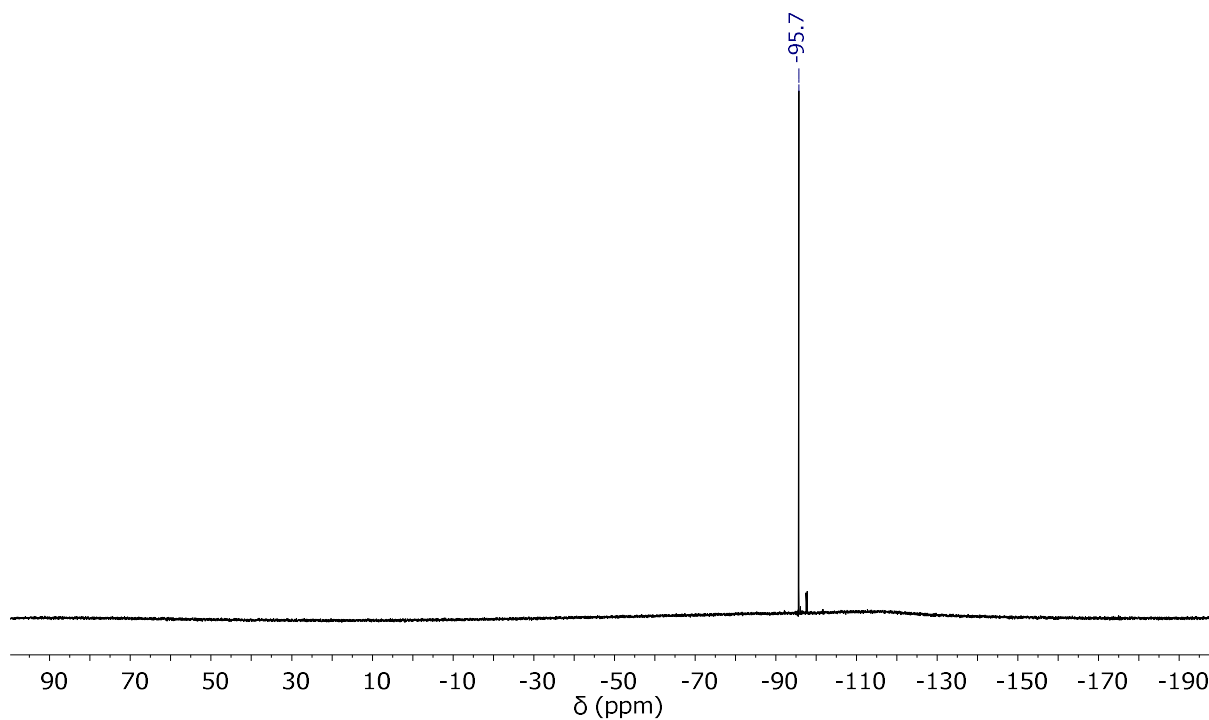

**Figure S23.**  $^{29}\text{Si}\{^1\text{H}\}$  NMR spectrum of **3-H** ( $[\text{D}_8]\text{THF}$ , 99.4 MHz).

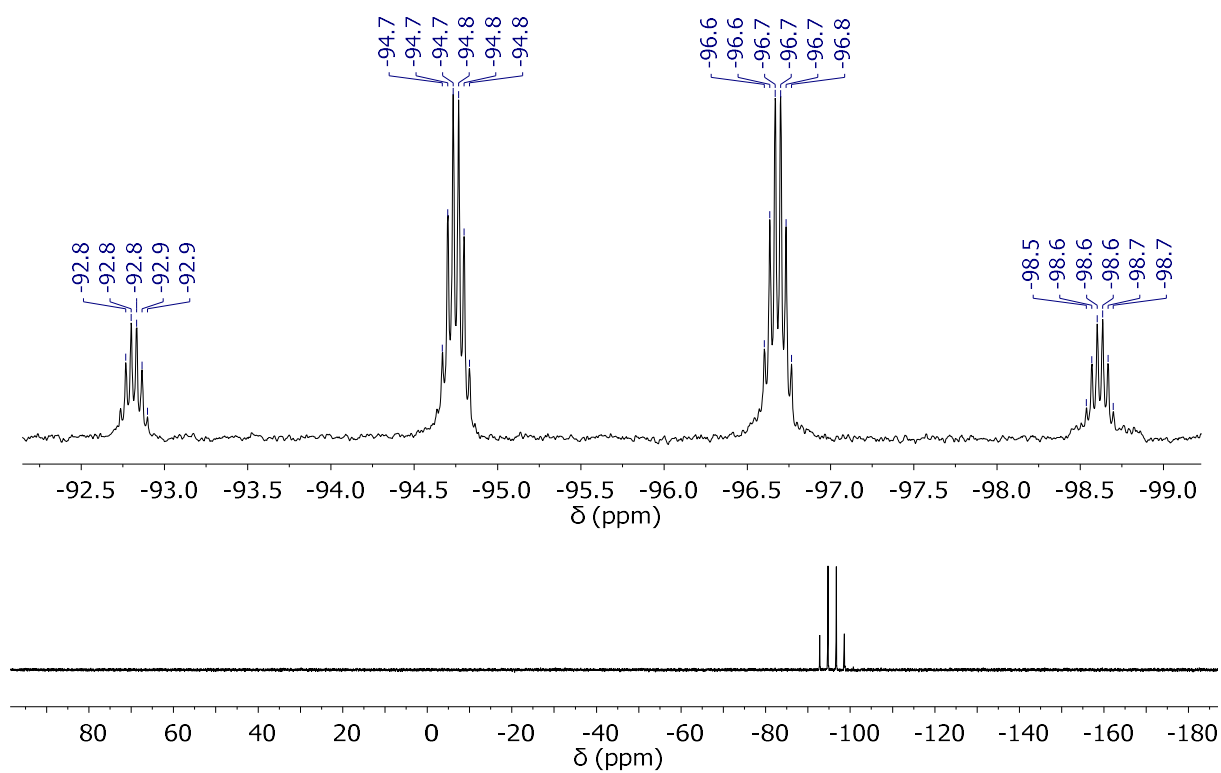

**Figure S24.**  $^{29}\text{Si}$  NMR spectrum of **3-H** ( $[\text{D}_8]\text{THF}$ , 99.4 MHz).

## 4. Characterization of CVD Coatings

### 4.1. General Considerations

All reactions were carried out under an inert-gas atmosphere (dry argon or nitrogen) using standard Schlenk or glove-box techniques

(a)

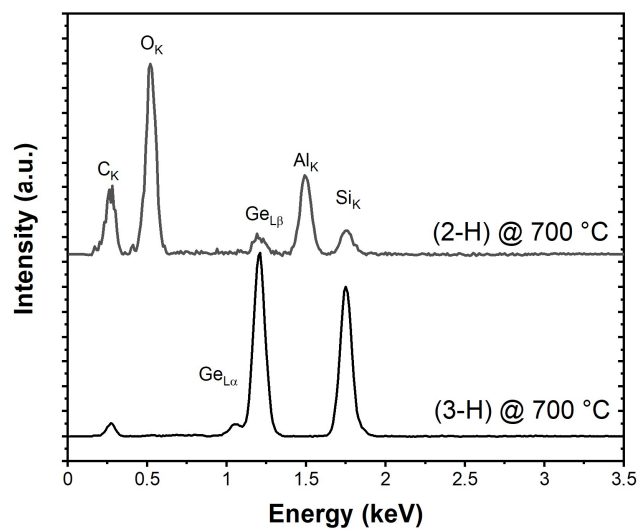

(b)

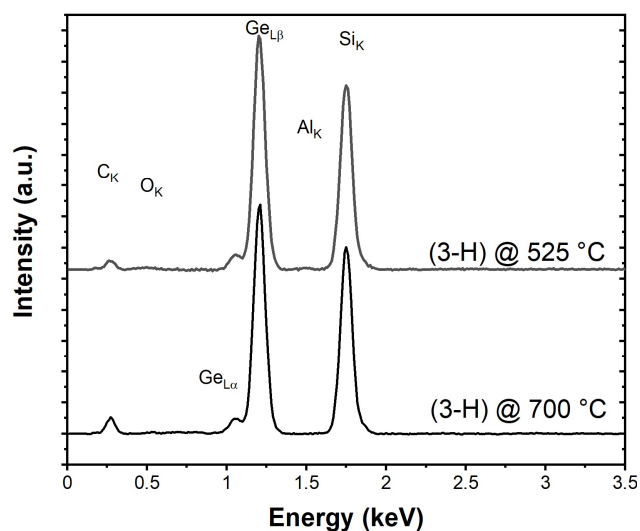

**Figure S25.** EDX spectra of (a) CVD films prepared using **2-H** and **3-H** at  $T_s=700$  °C and (b) a comparison of the EDX spectra of  $\text{Si}_{1-x}\text{Ge}_x$  films derived by using **3-H** at different substrate temperatures.



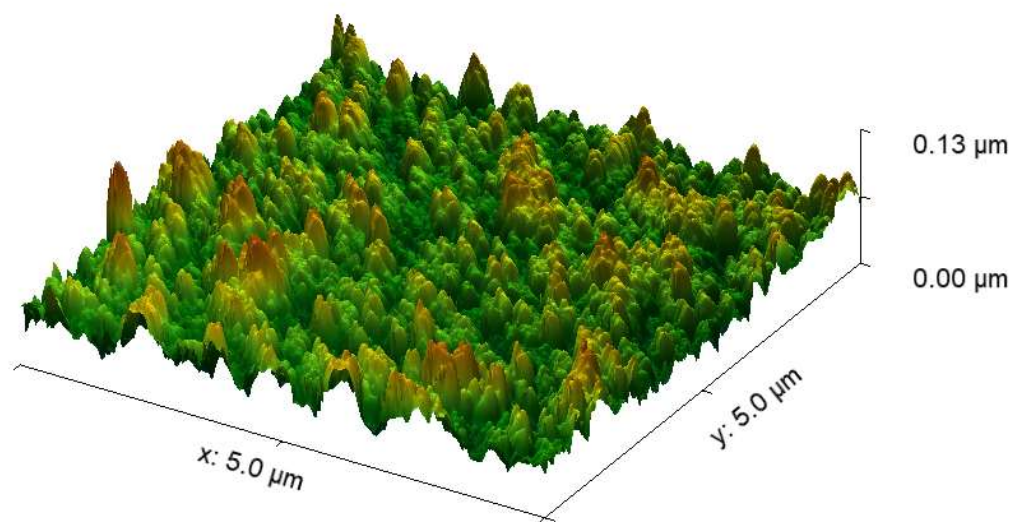

**Figure S26.** The AFM image of a Si<sub>1-x</sub>Ge<sub>x</sub> deposit prepared at T<sub>S</sub>=700 °C using **3-H** shows the formation of a smooth film without significant surface roughness.

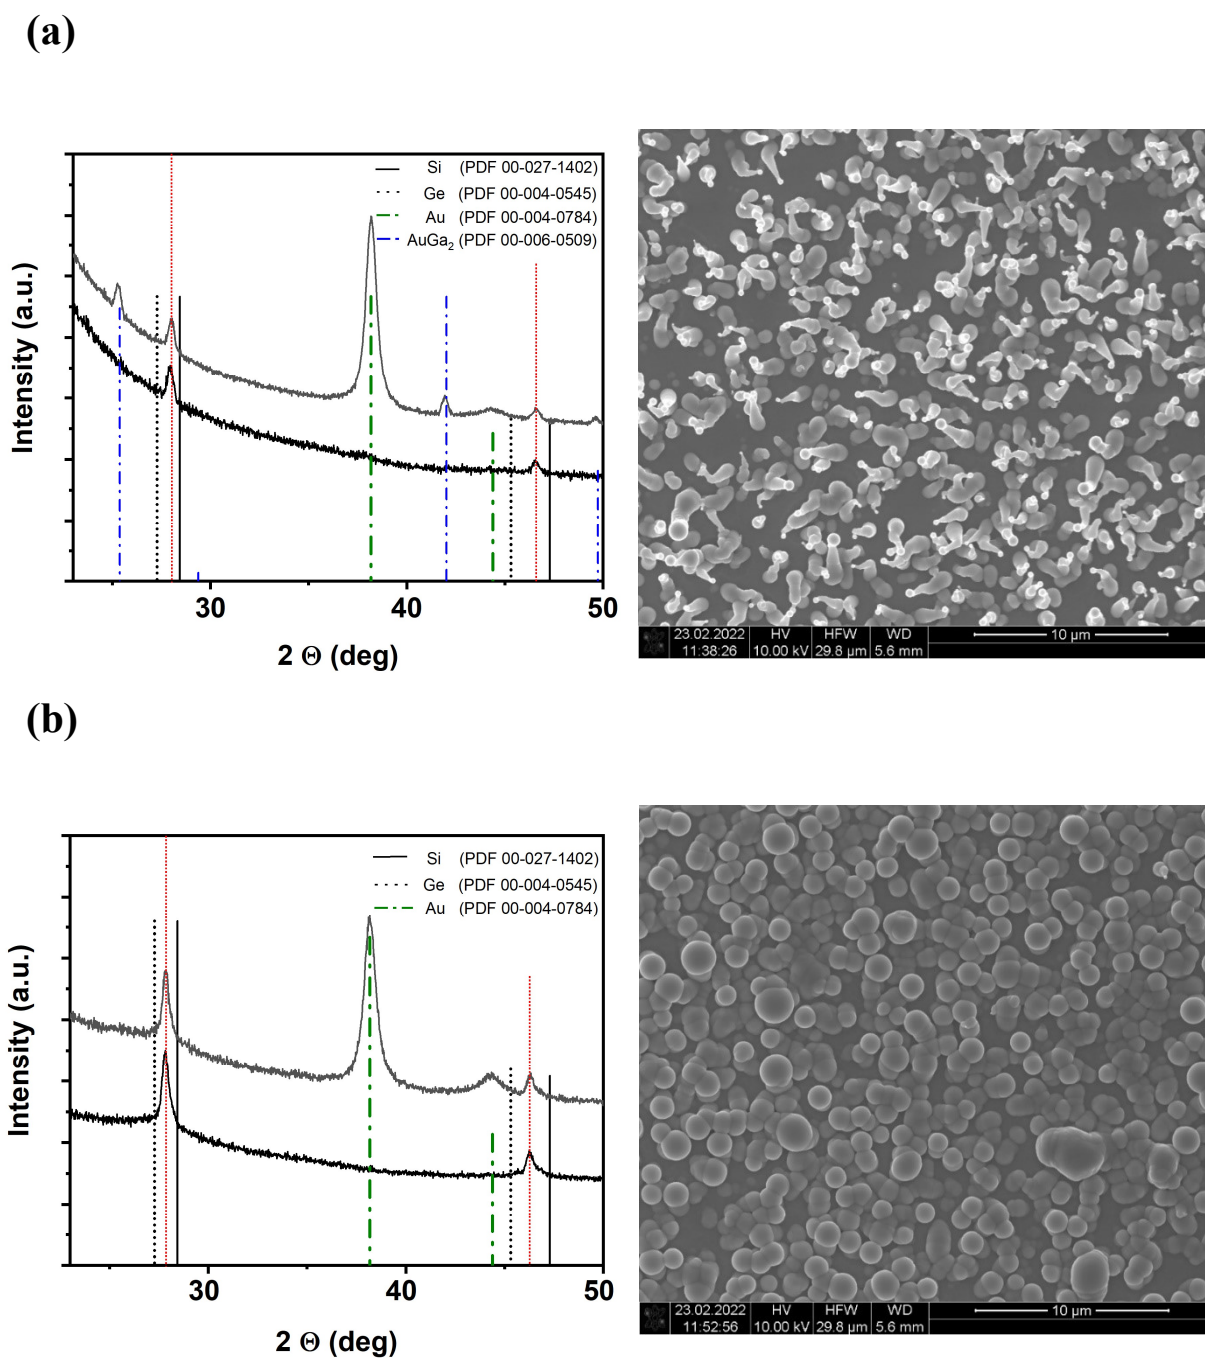

**Figure S27.** XRD and SEM images of Ga-supported crystallization of  $\text{Si}_{1-x}\text{Ge}_x$  layers for (a) single Ga pulse and (b) three Ga pulses during the CVD using precursor **3-H** at  $T_S = 525^\circ\text{C}$ . Both films have been coated with Au post-growth to add a reference for XRD results. (a) represents Si:Ge ratio in the crystalline phase of 1.7 while in (b) merely 1.1 can be calculated by using Vegard's law.

## 5. References

1. Teichmann, J.; Kunkel, C.; Georg, I.; Moxter, M.; Santowski, T.; Bolte, M.; Lerner, H.-W.; Bade, S.; Wagner, M., Tris(trichlorosilyl)tetrelide Anions and a Comparative Study of Their Donor Qualities. *Chem. - Eur. J.* **2019**, *25*, 2740-2744.
2. Teichmann, J.; Wagner, M., Silicon chemistry in zero to three dimensions: from dichlorosilylene to silafullerane. *Chem. Commun.* **2018**, *54*, 1397-1412.
3. Satgé, J.; Rivière, P., Formation of the Germanium-Germanium Bond by Reaction with Germyl-Metal Reagents. In *Inorganic Reactions and Methods*, J. J. Zuckerman; Hagen, A. P., Eds. VCH Publishers, Inc.: 1991; Vol. 9, pp 55-59.
4. Kraus, C. A.; Sherman, C. S., Preparation of Some Derivatives of Triphenylgermanium by Means of Sodium Triphenylgermanide. *J. Am. Chem. Soc.* **1933**, *55*, 4694-4697.
5. Cie, S. *X-AREA. Diffractometer control program system.*; Darmstadt, Germany, 2002.
6. Sheldrick, G., A short history of SHELX. *Acta Crystallogr., Sect. A* **2008**, *64*, 112-122.
